# Supplementary material
Source: PubMed Central journal article supplement (PMC7045317)

# **Ionicly tagged magnetic nanoparticles with urea linker: Application for preparation of 2-aryl-quinoline-4-carboxylic acids via an anomeric based oxidation mechanism**

Parvin Ghasemi,<sup>1</sup> Meysam Yarie,<sup>\*2</sup> Mohammad Ali Zolfigol,<sup>\*2</sup> Avat (Arman) Taherpour<sup>\*1,3</sup>,  
Morteza Torabi<sup>2</sup>

---

<sup>1</sup>Department of Organic Chemistry, Razi University, P.O. Box: 67149-67346, Kermanshah, Iran. E-mail: [avatarman.taherpour@gmail.com](mailto:avatarman.taherpour@gmail.com).

<sup>2</sup>Department of Organic Chemistry, Faculty of Chemistry, Bu-Ali Sina University, Hamedan, Iran. E-mail: [zolfi@basu.ac.ir](mailto:zolfi@basu.ac.ir); [mzolfigol@yahoo.com](mailto:mzolfigol@yahoo.com); [myari.5266@gmail.com](mailto:myari.5266@gmail.com), Fax: +98 8138257407; Tel: +98 8138282807

<sup>3</sup>Medical Biology Research Center, Kermanshah University of Medical Sciences, Kermanshah, Iran.

Figure S1: FT-IR spectrum of 2-phenylbenzo[h]quinoline-4-carboxylic acid (1a)

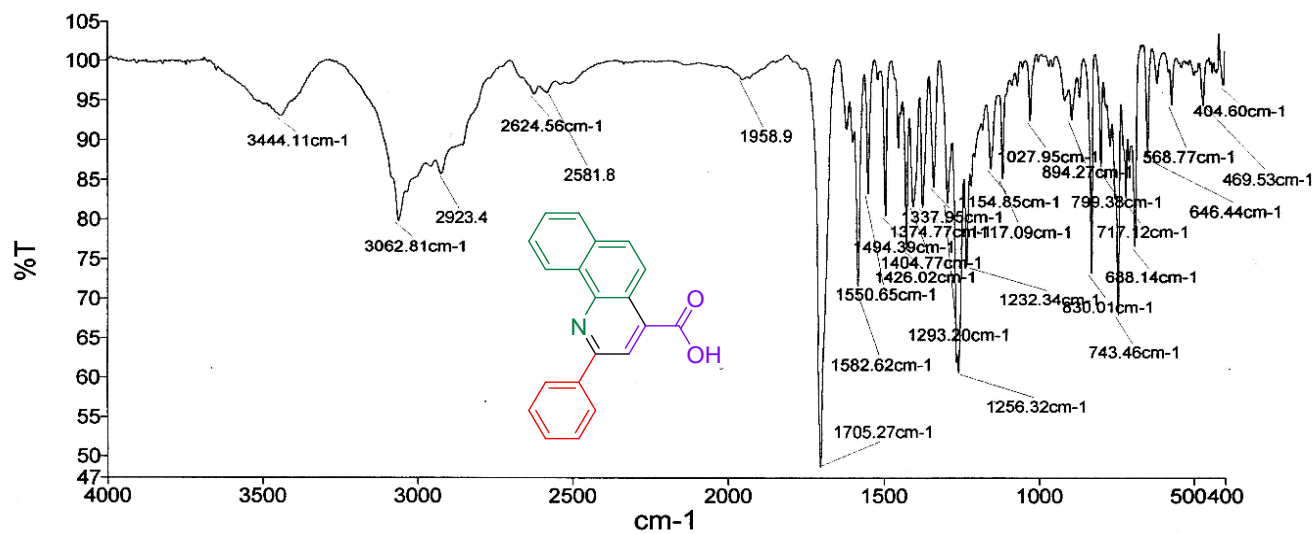

Figure S2: <sup>1</sup>H NMR spectrum of 2-phenylbenzo[h]quinoline-4-carboxylic acid (1a)

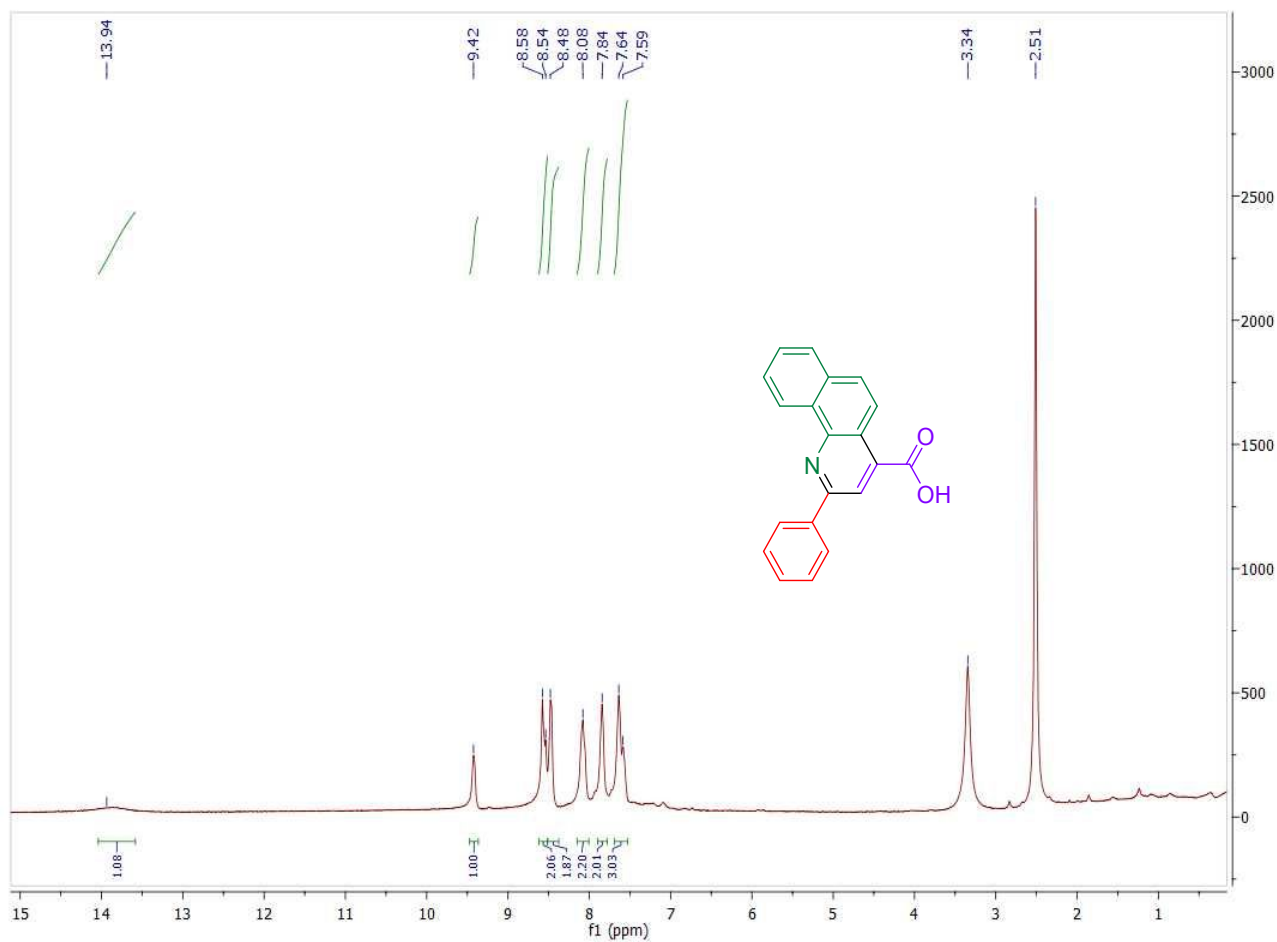

Figure S3:  $^{13}\text{C}$  NMR spectrum of 2-phenylbenzo[*h*]quinoline-4-carboxylic acid (1a)

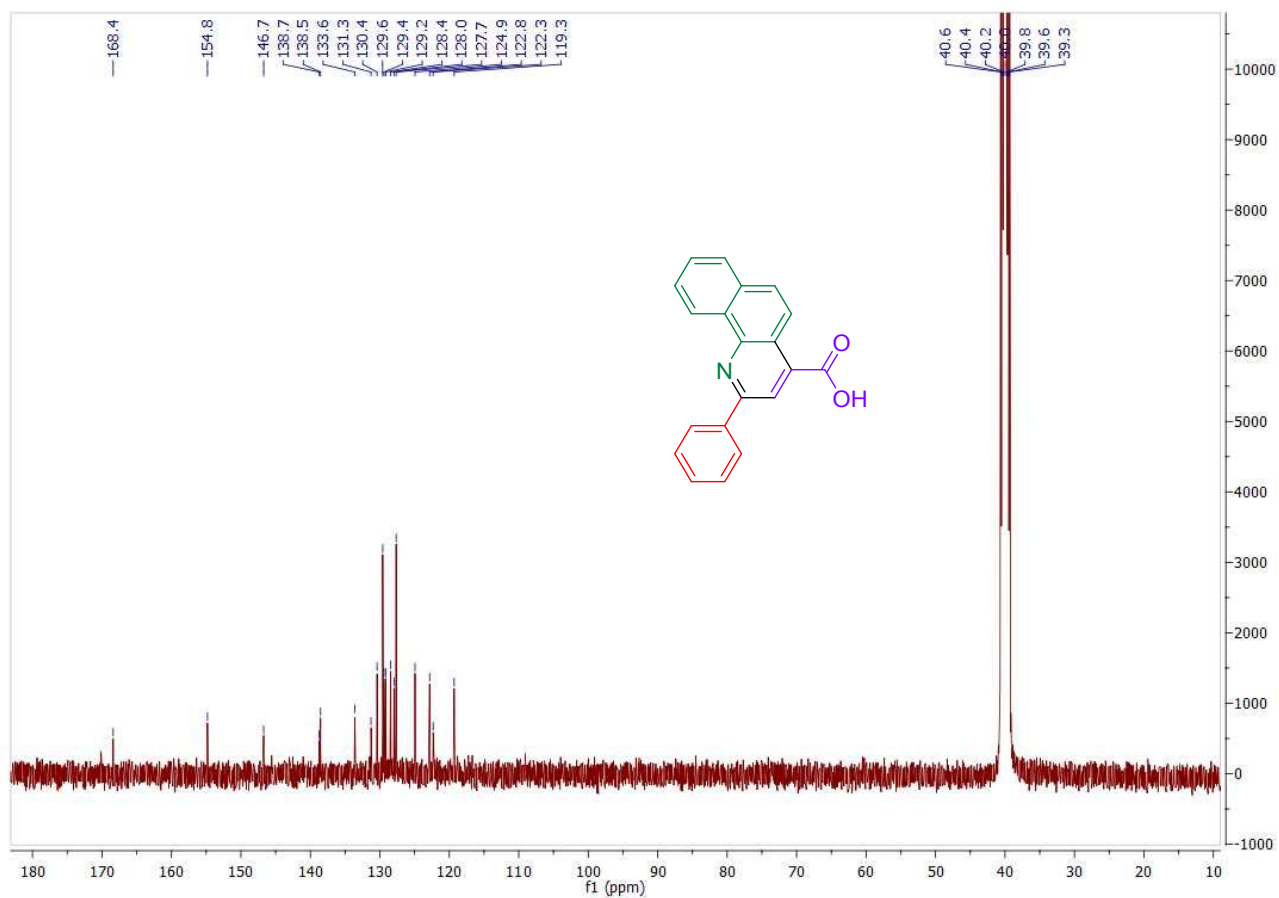

Figure S4: FT-IR spectrum of 2-(*p*-tolyl)benzo[*h*]quinoline-4-carboxylic acid (1b)

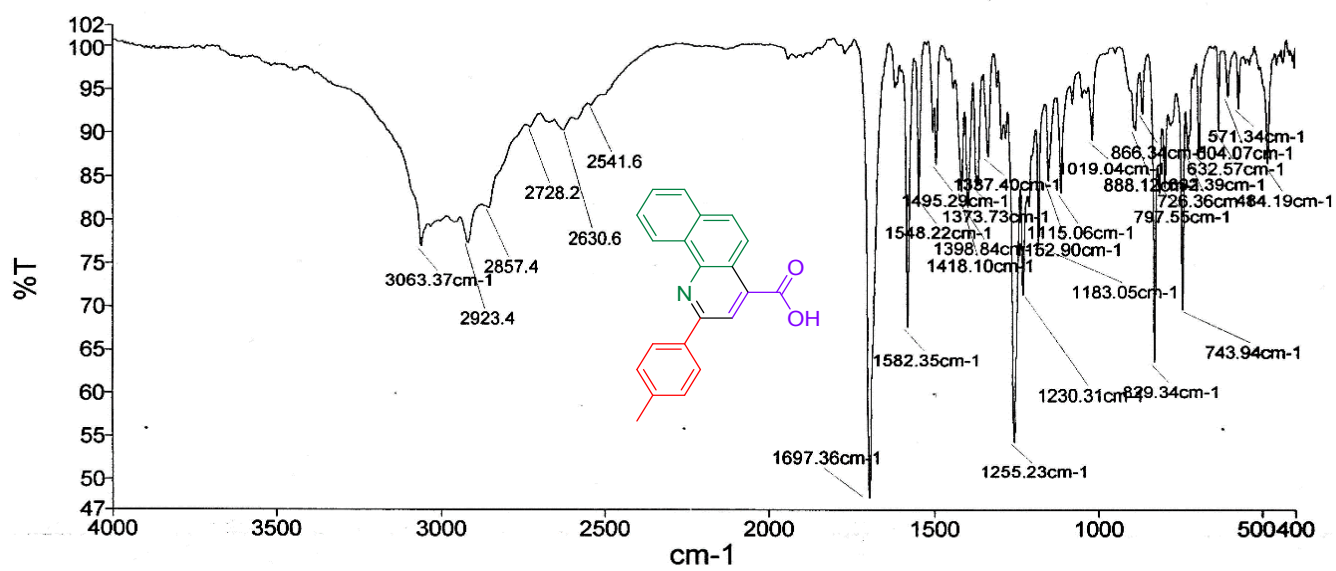

Figure S5:  $^1\text{H}$  NMR spectrum of 2-(*p*-tolyl)benzo[*h*]quinoline-4-carboxylic acid (1b)

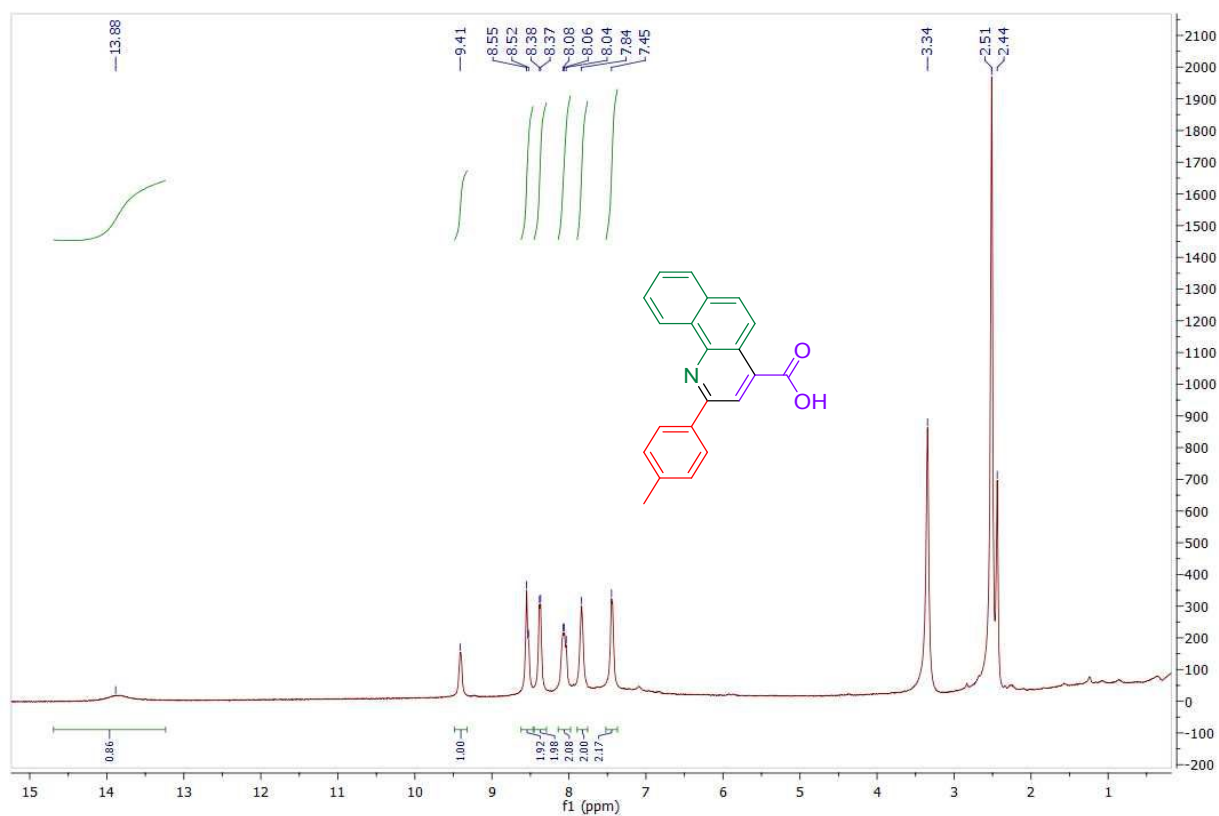

Figure S6:  $^{13}\text{C}$  NMR spectrum of 2-(*p*-tolyl)benzo[*h*]quinoline-4-carboxylic acid (1b)

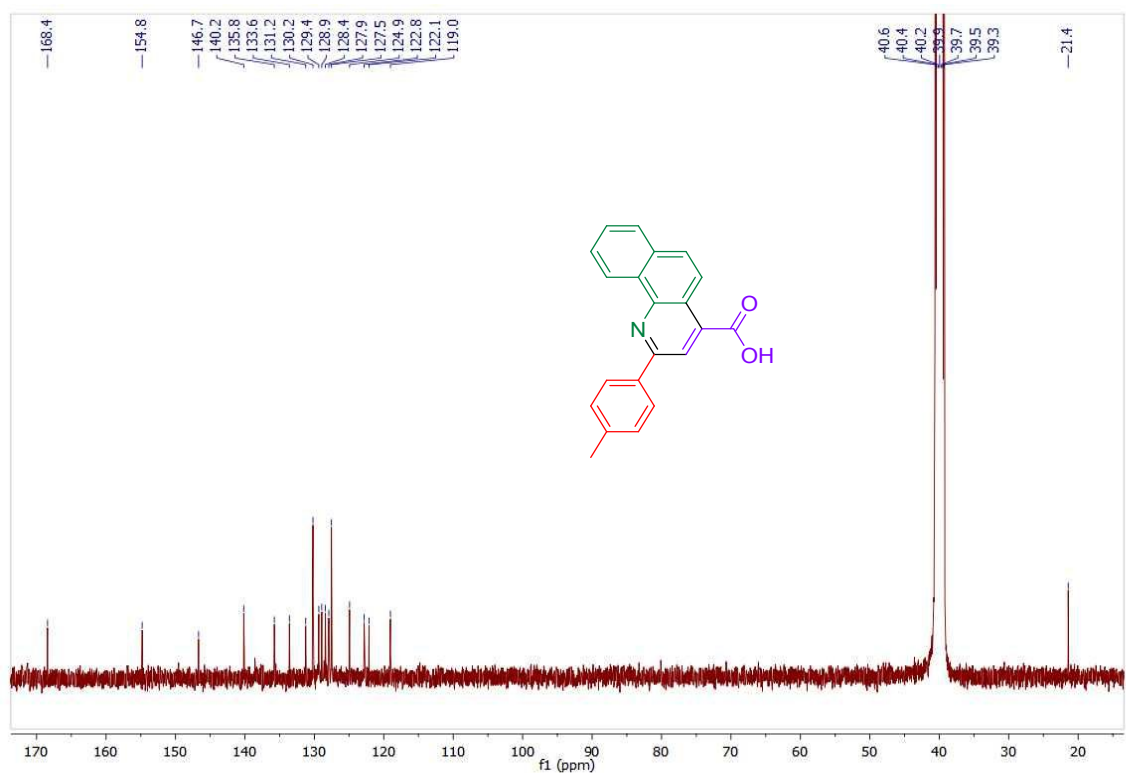

Figure S7: FT-IR spectrum of 2-(4-methoxyphenyl)benzo[*h*]quinoline-4-carboxylic acid (1c)

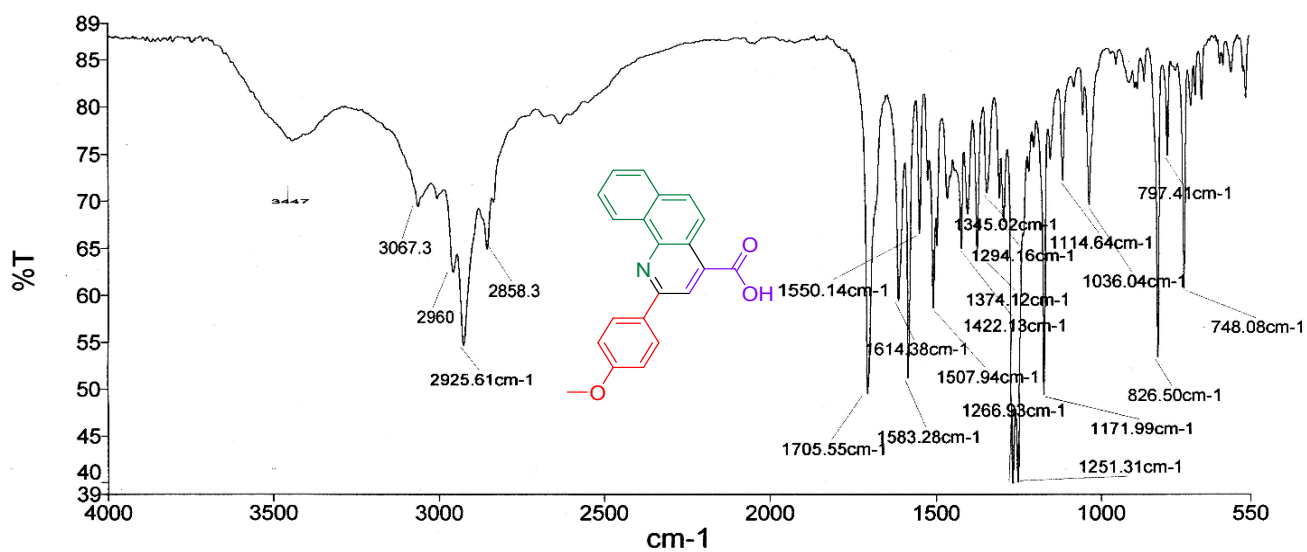

Figure S8: <sup>1</sup>H NMR spectrum of 2-(4-methoxyphenyl)benzo[*h*]quinoline-4-carboxylic acid (1c)

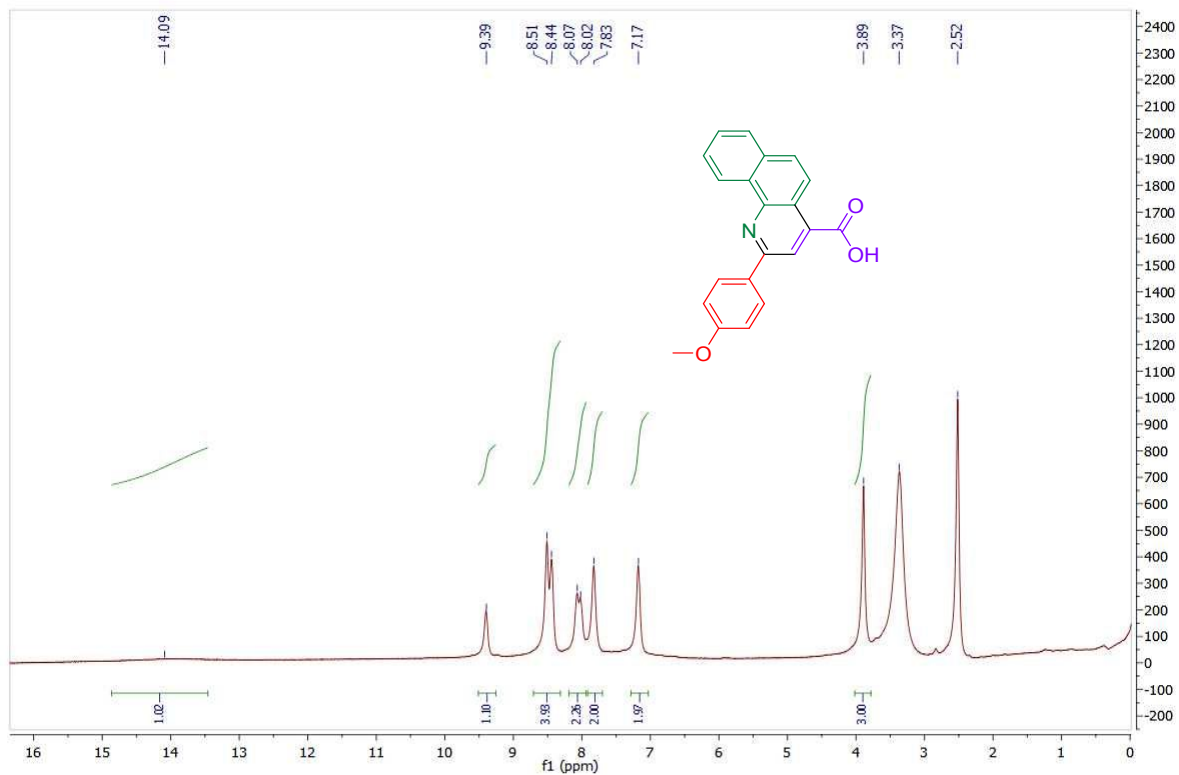

Figure S9:  $^{13}\text{C}$  NMR spectrum of 2-(4-methoxyphenyl)benzo[*h*]quinoline-4-carboxylic acid

(1c)

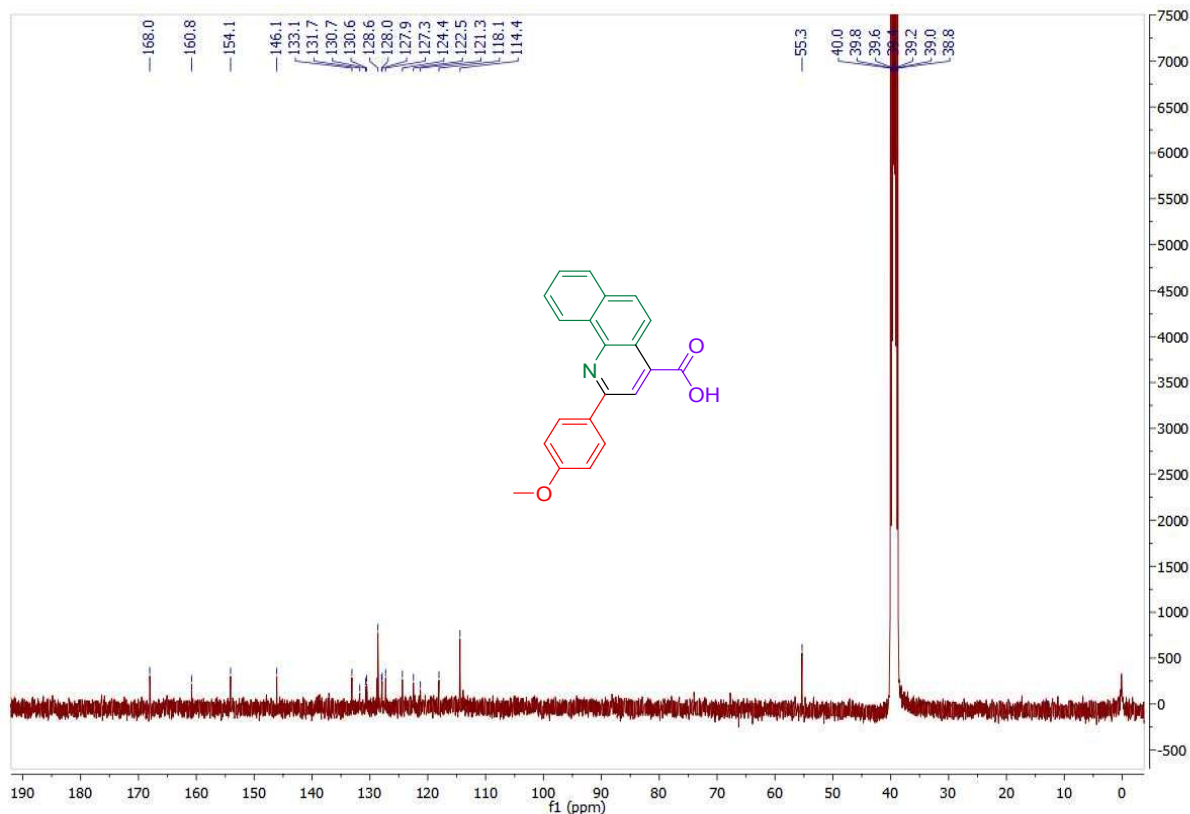

Figure S10: FT-IR spectrum of 2-(3-methoxyphenyl)benzo[*h*]quinoline-4-carboxylic acid

(1d)

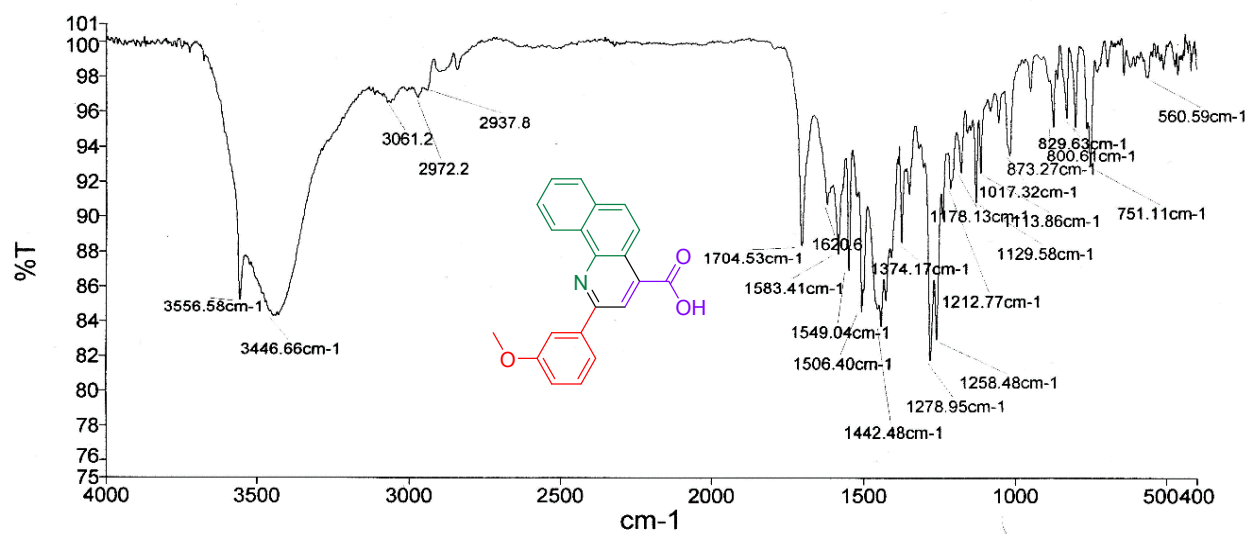

Figure S11: <sup>1</sup>H NMR spectrum of 2-(3-methoxyphenyl)benzo[*h*]quinoline-4-carboxylic acid

(1d)

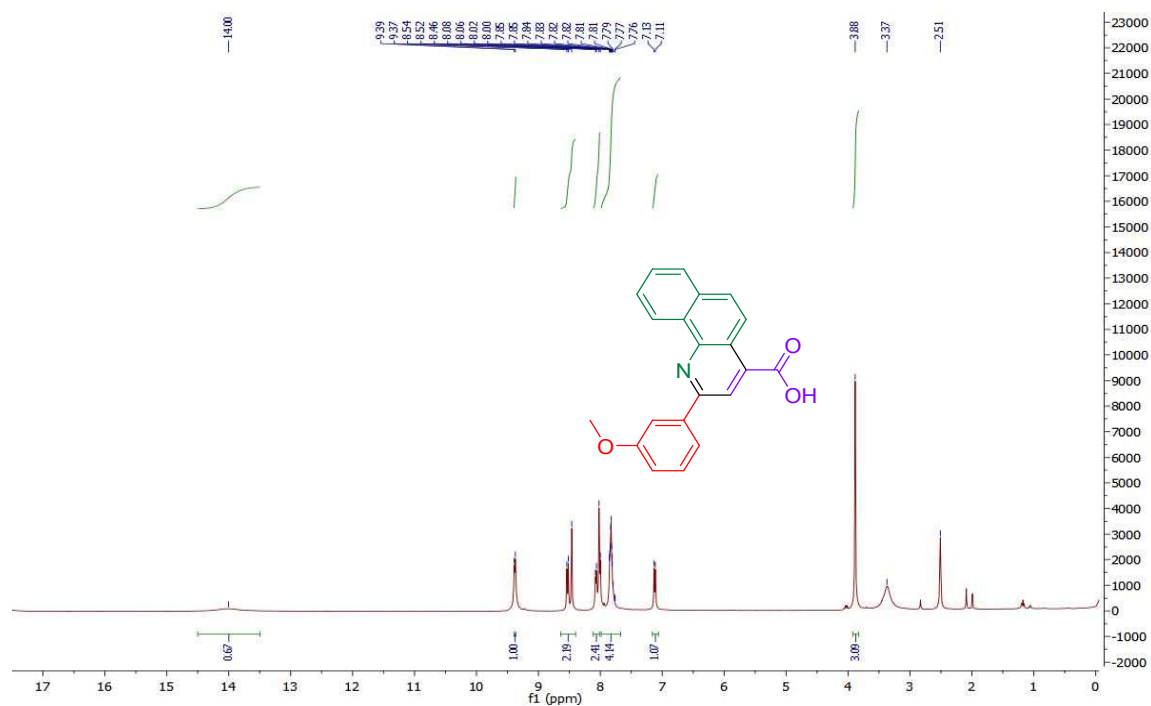

Figure S12: <sup>13</sup>C NMR spectrum of 2-(3-methoxyphenyl)benzo[*h*]quinoline-4-carboxylic acid

(1d)

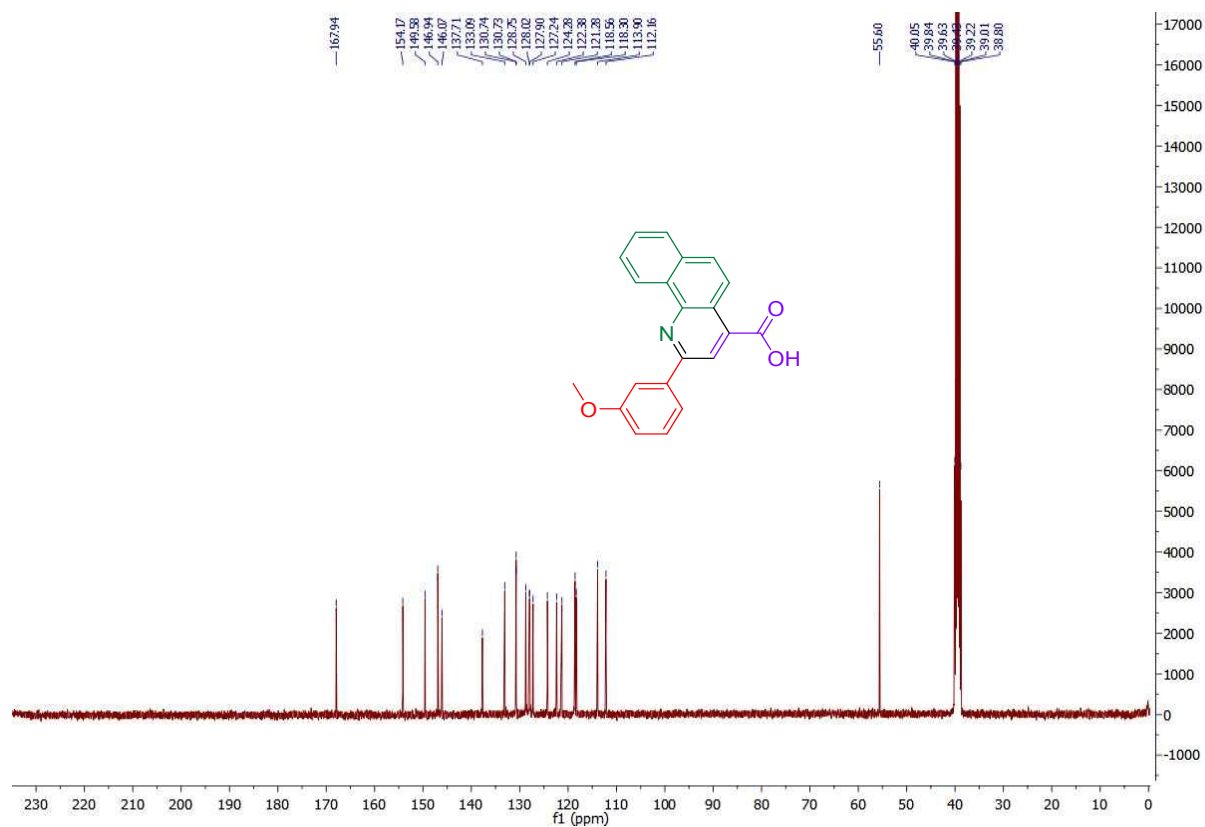

Figure S13: FT-IR spectrum of 2-(4-(dimethylamino)phenyl)benzo[*h*]quinoline-4-carboxylic acid (1e)

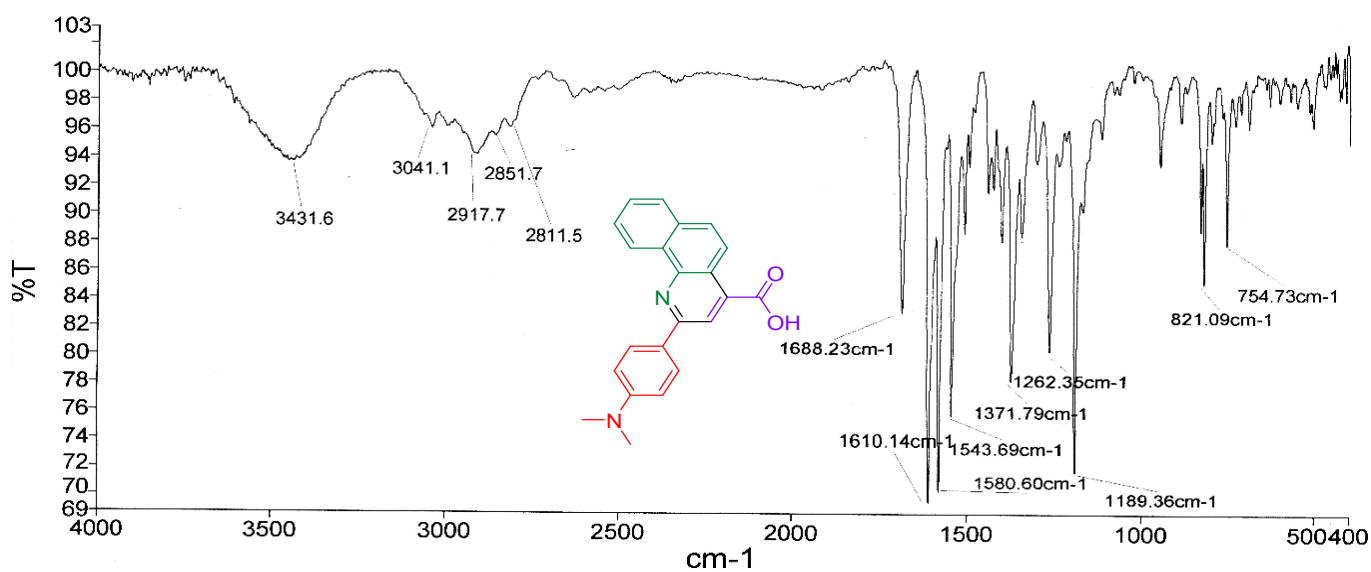

Figure S14: <sup>1</sup>H NMR spectrum of 2-(4-(dimethylamino)phenyl)benzo[*h*]quinoline-4-carboxylic acid (1e)

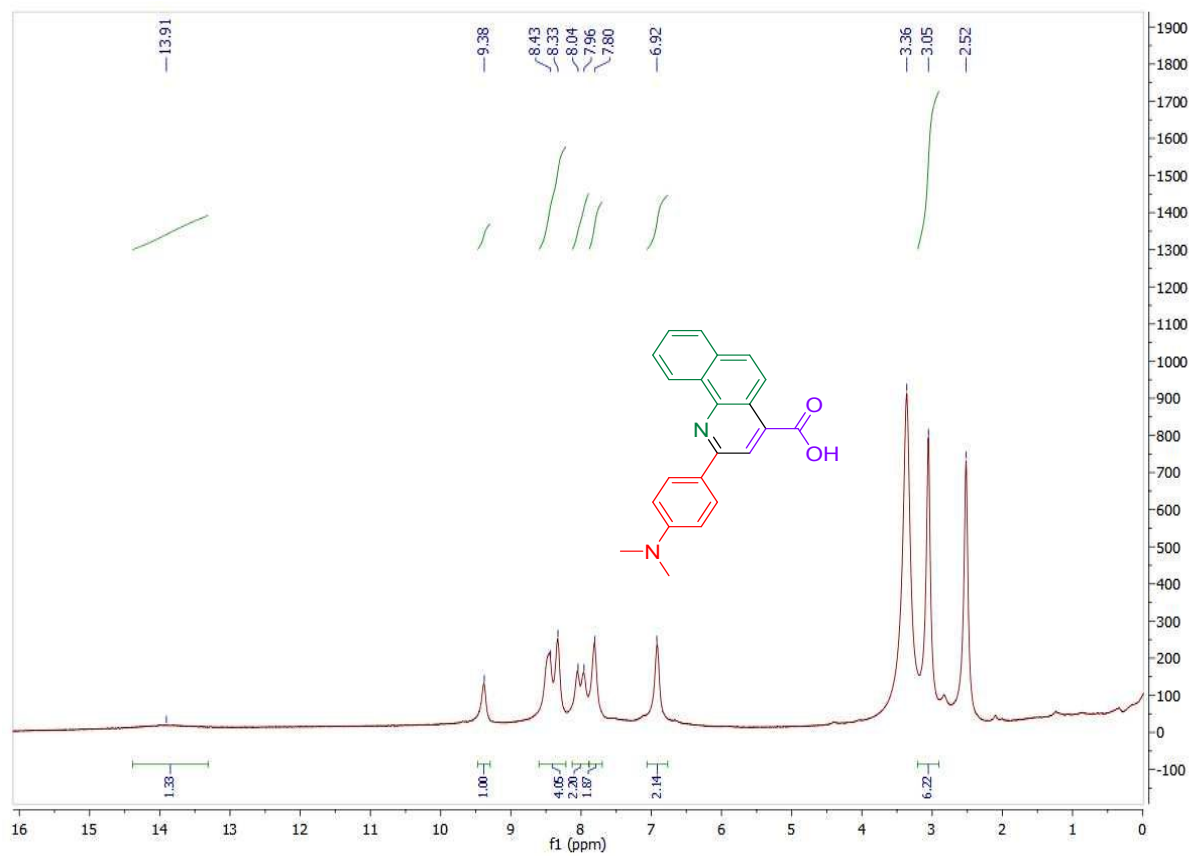



Figure S15:  $^{13}\text{C}$  NMR spectrum of 2-(4-(dimethylamino)phenyl)benzo[*h*]quinoline-4-carboxylic acid (1e)

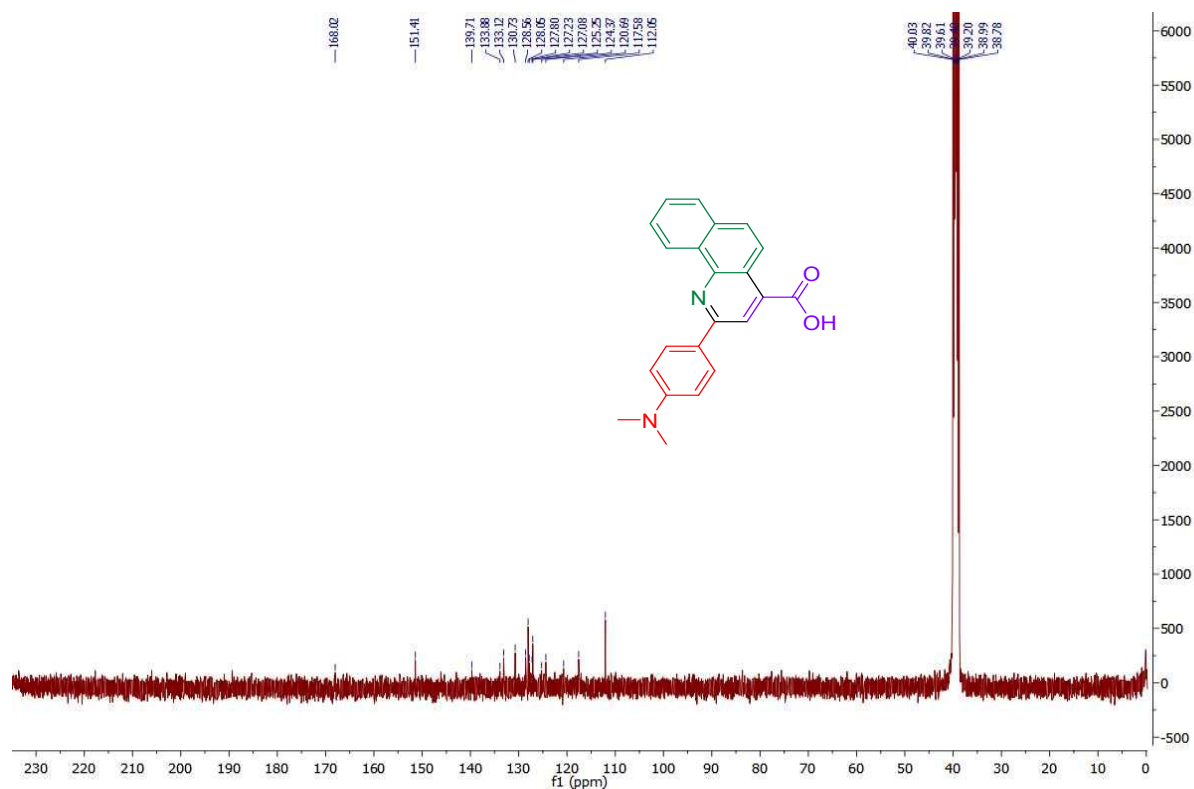

Figure S16: FT-IR spectrum of 2-(2-chlorophenyl)benzo[*h*]quinoline-4-carboxylic acid (1f)

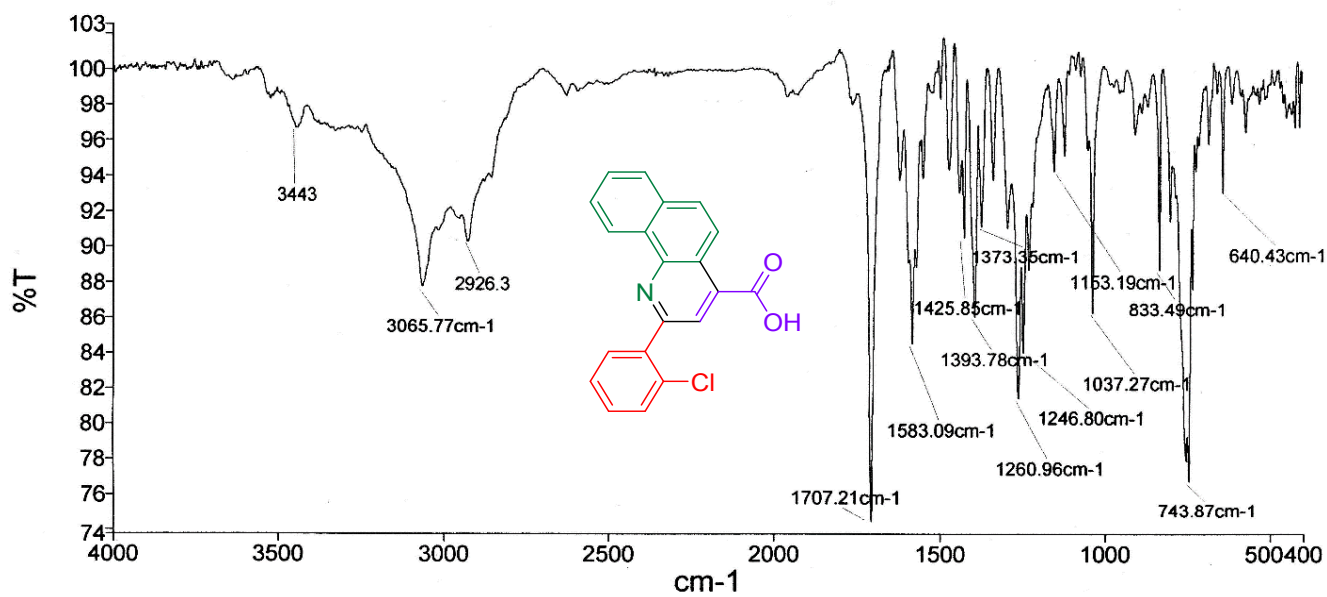

Figure S17:  $^1\text{H}$  NMR spectrum of 2-(2-chlorophenyl)benzo[*h*]quinoline-4-carboxylic acid (1f)

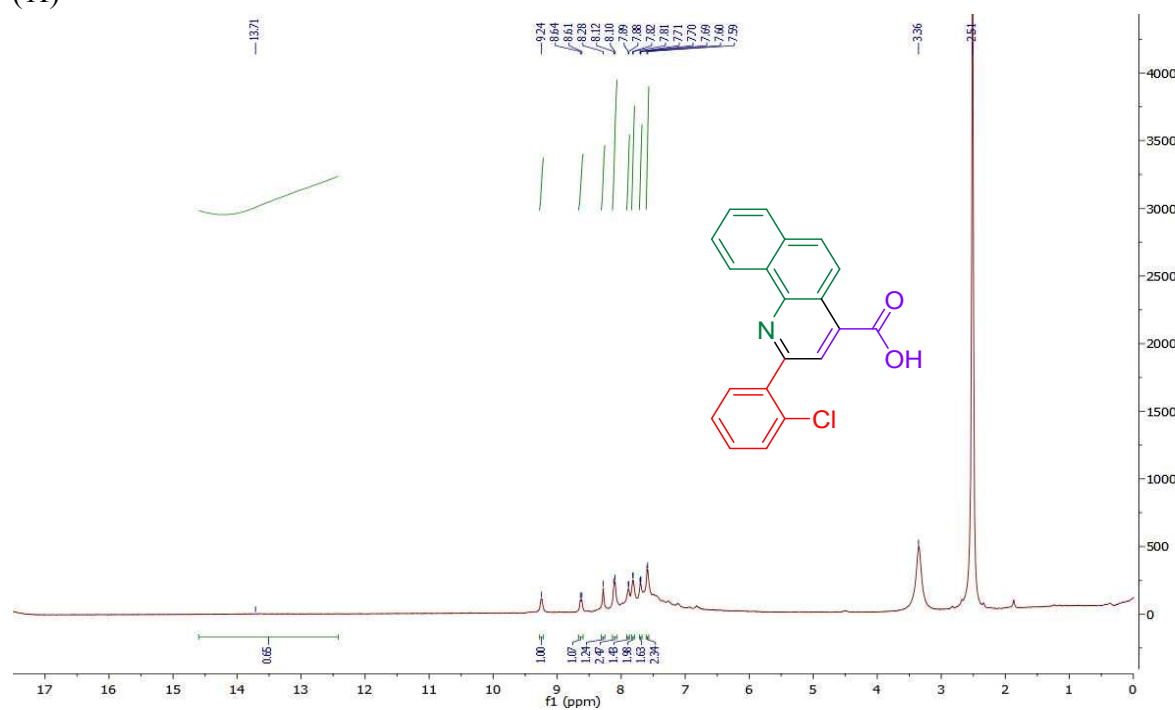

Figure S18:  $^{13}\text{C}$  NMR spectrum of 2-(2-chlorophenyl)benzo[*h*]quinoline-4-carboxylic acid (1f)

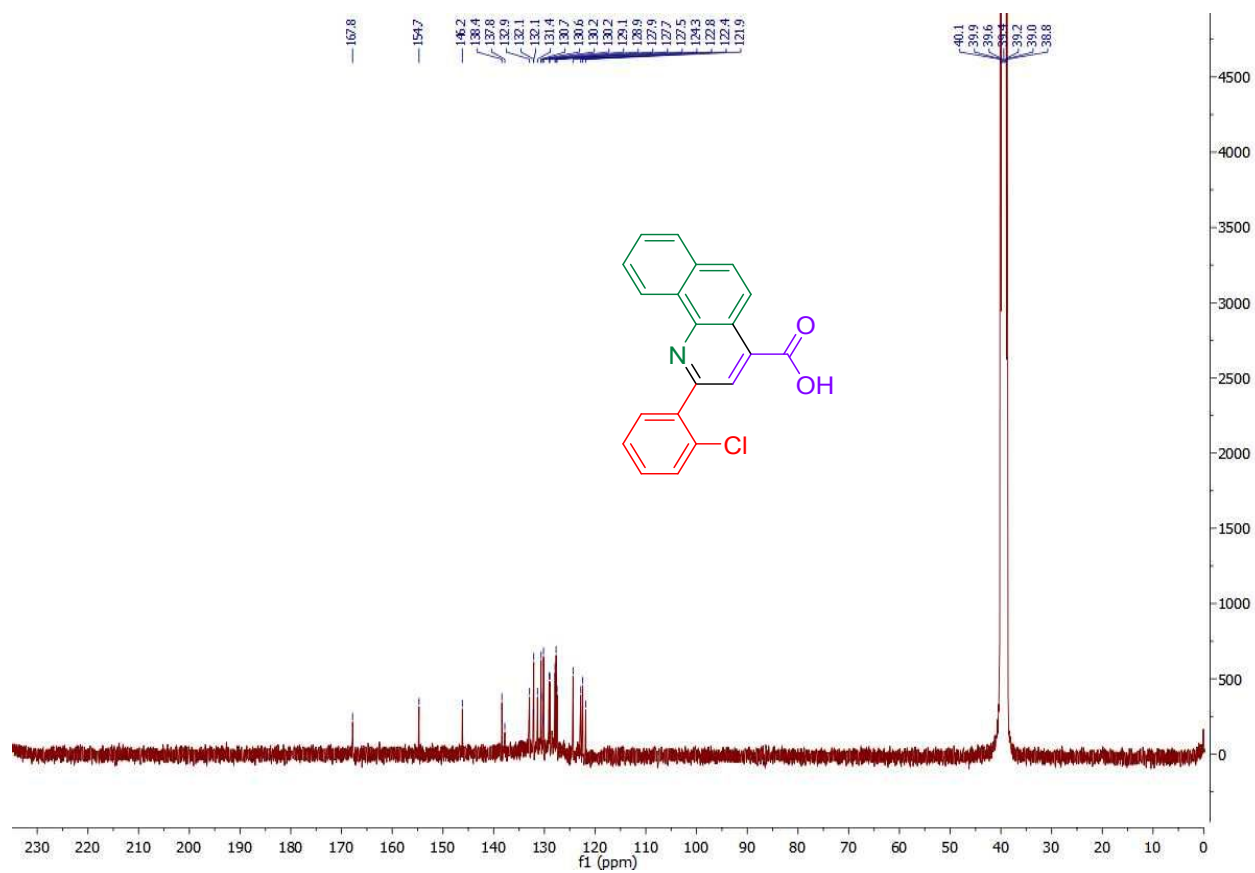

Figure S19: FT-IR spectrum of 2-(4-chlorophenyl)benzo[*h*]quinoline-4-carboxylic acid (1g)

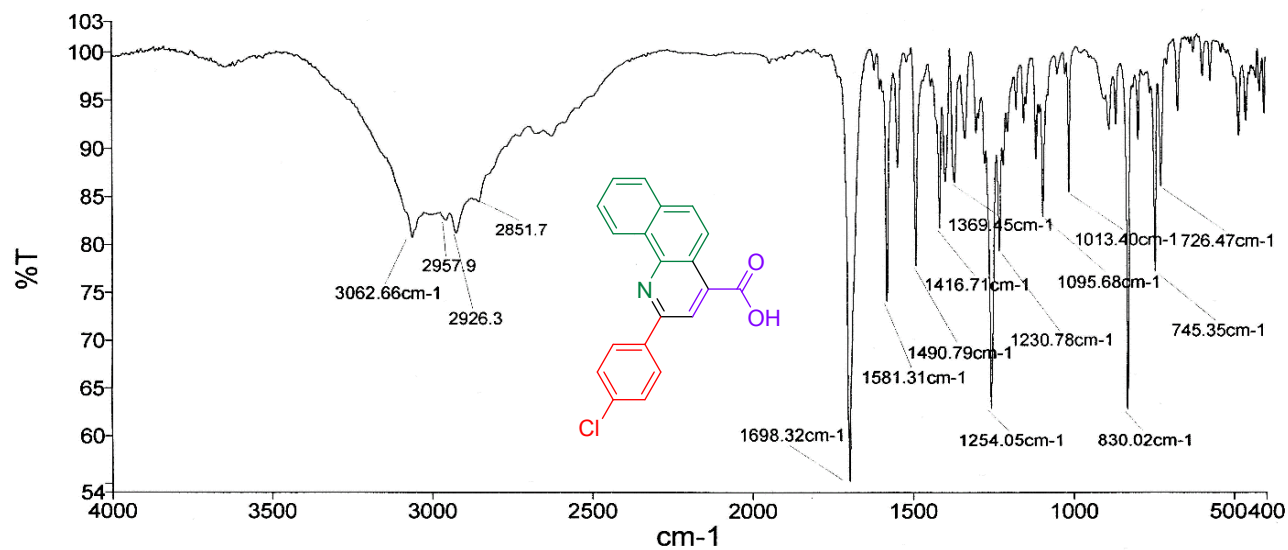

Figure S20: <sup>1</sup>H NMR spectrum of 2-(4-chlorophenyl)benzo[*h*]quinoline-4-carboxylic acid (1g)

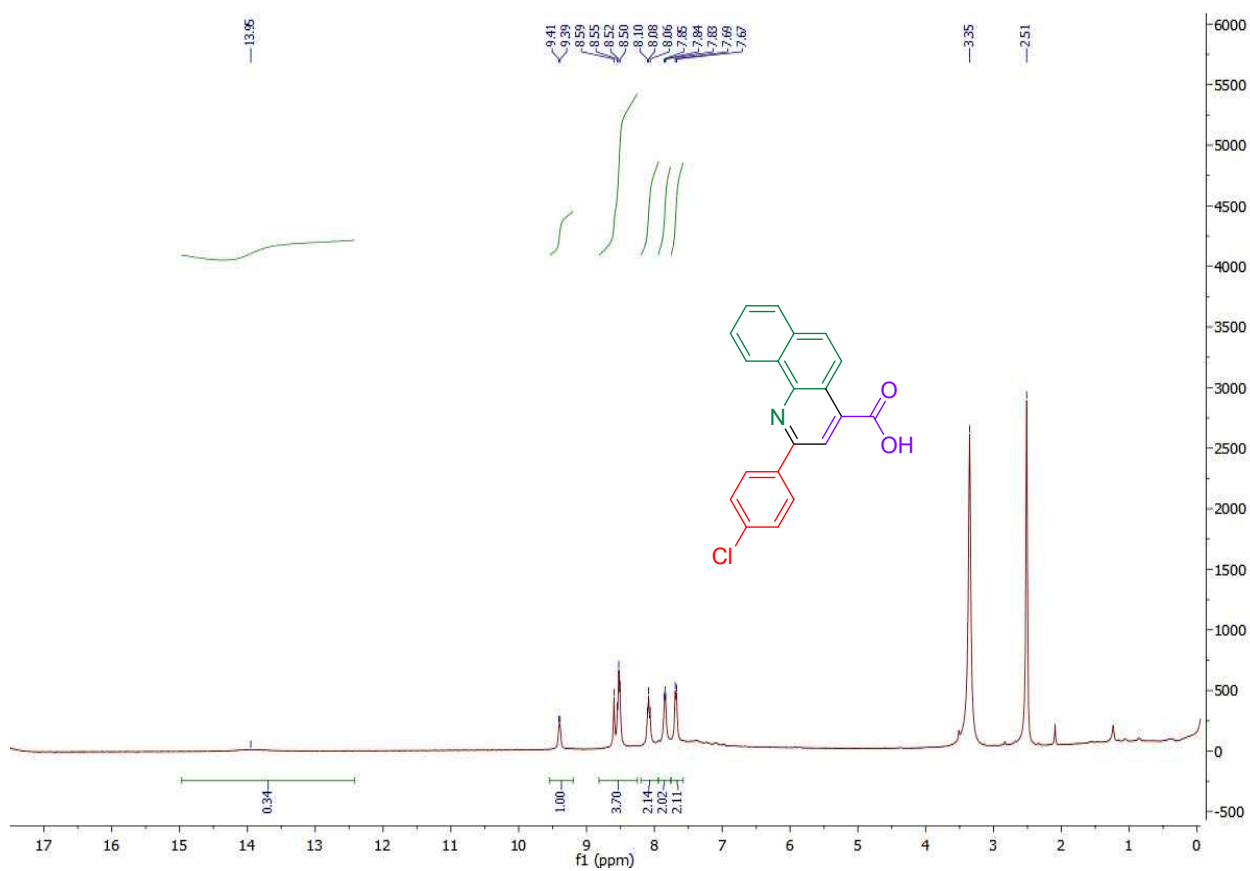

Figure S21:  $^{13}\text{C}$  NMR spectrum of 2-(4-chlorophenyl)benzo[*h*]quinoline-4-carboxylic acid

(1g)

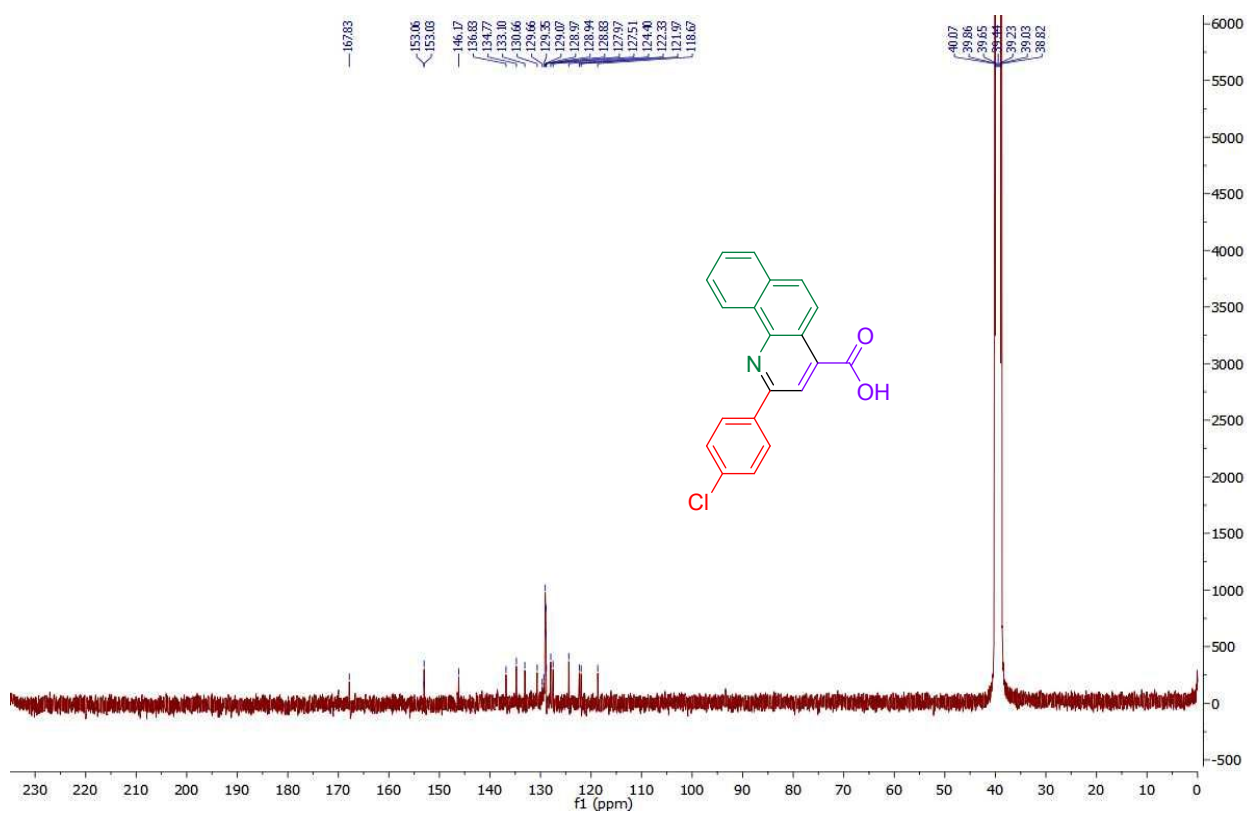

Figure S22: FT-IR spectrum of 2-(2,4-dichlorophenyl)benzo[*h*]quinoline-4-carboxylic acid

(1h)

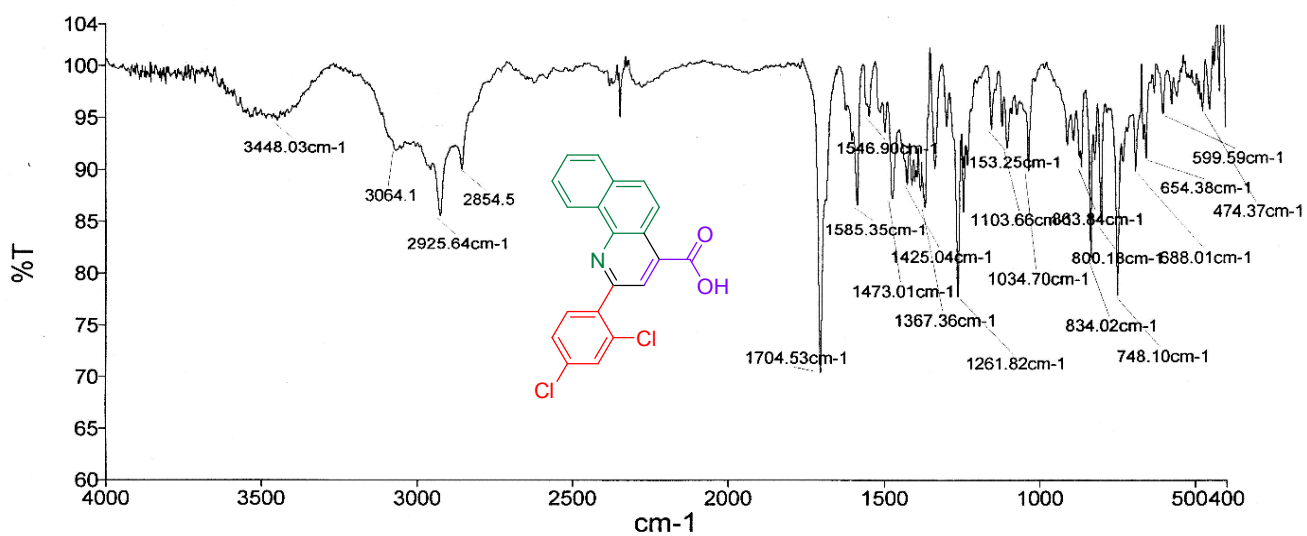

Figure S23:  $^1\text{H}$  NMR spectrum of 2-(2,4-dichlorophenyl)benzo[*h*]quinoline-4-carboxylic acid (1h)

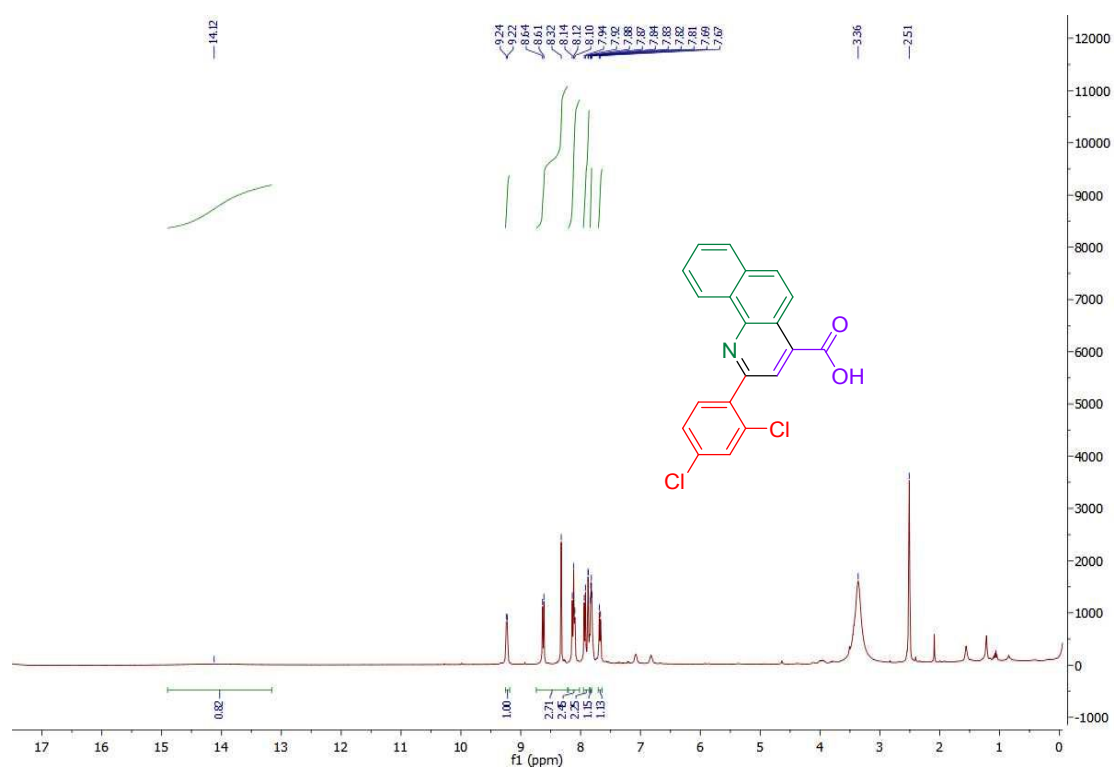

Figure S24:  $^{13}\text{C}$  NMR spectrum of 2-(2,4-dichlorophenyl)benzo[*h*]quinoline-4-carboxylic acid (1h)

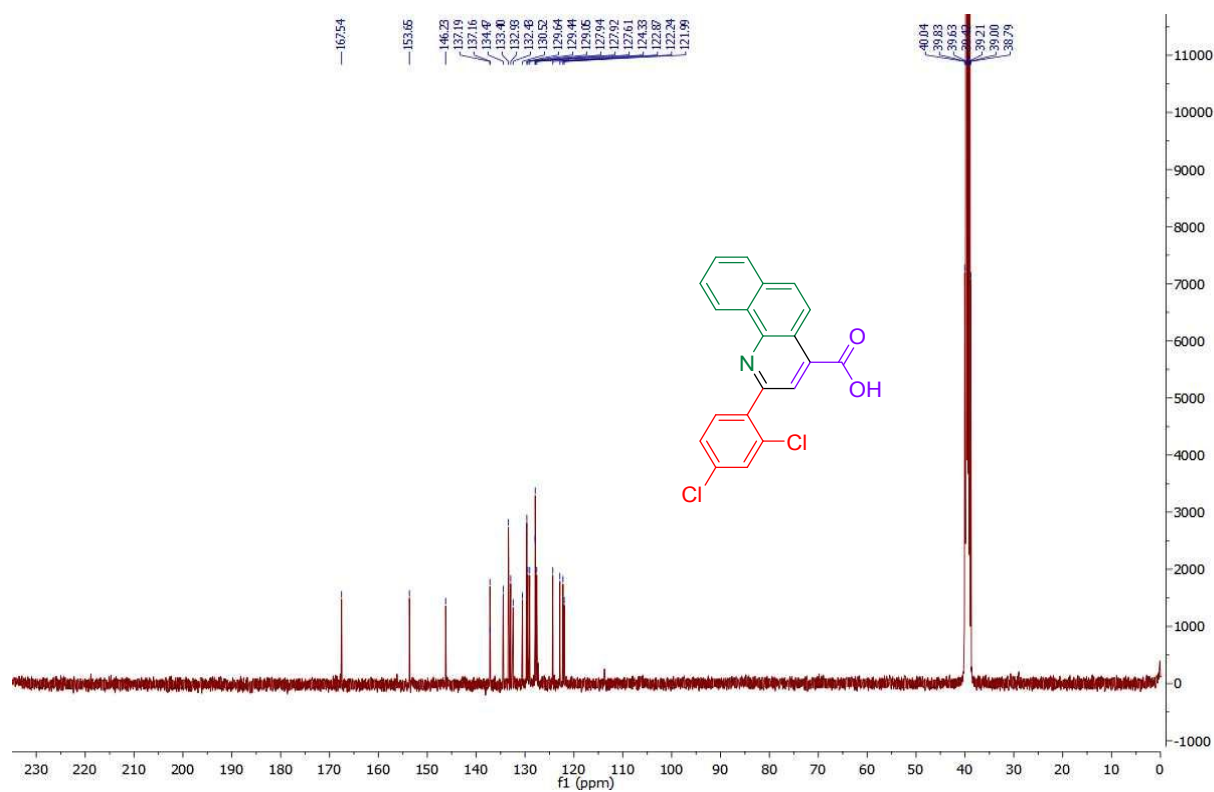

Figure S25: FT-IR spectrum of 2-(2,6-dichlorophenyl)benzo[*h*]quinoline-4-carboxylic acid

(1i)

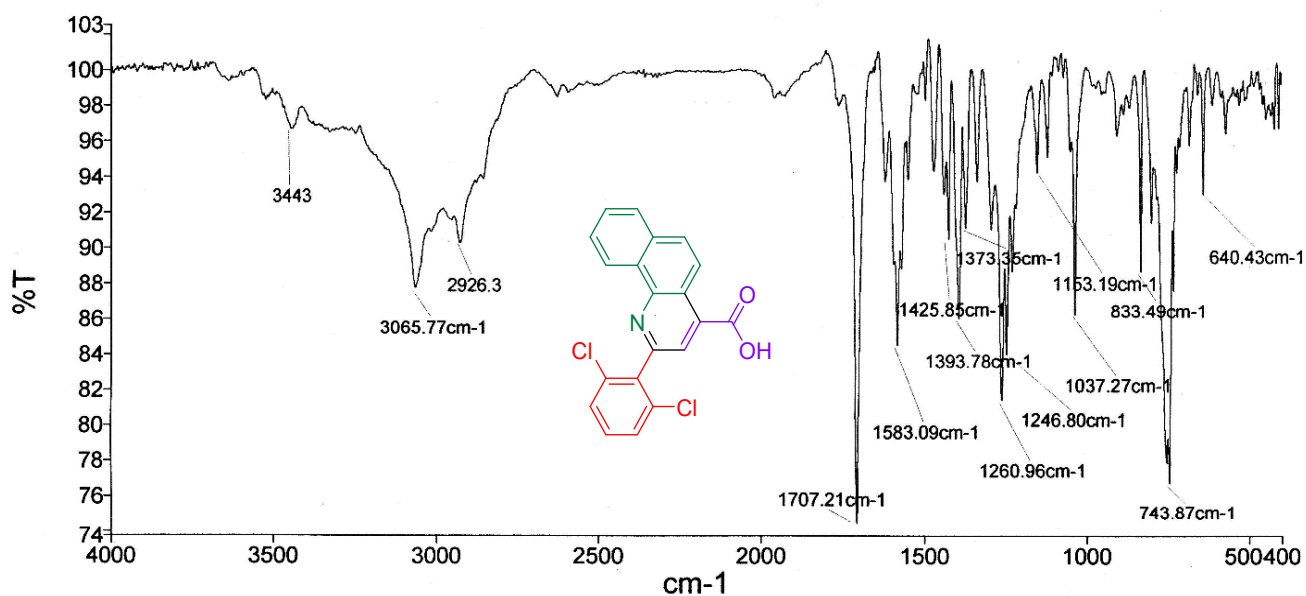

Figure S26:  $^1\text{H}$  NMR spectrum of 2-(2,6-dichlorophenyl)benzo[*h*]quinoline-4-carboxylic acid

(1i)

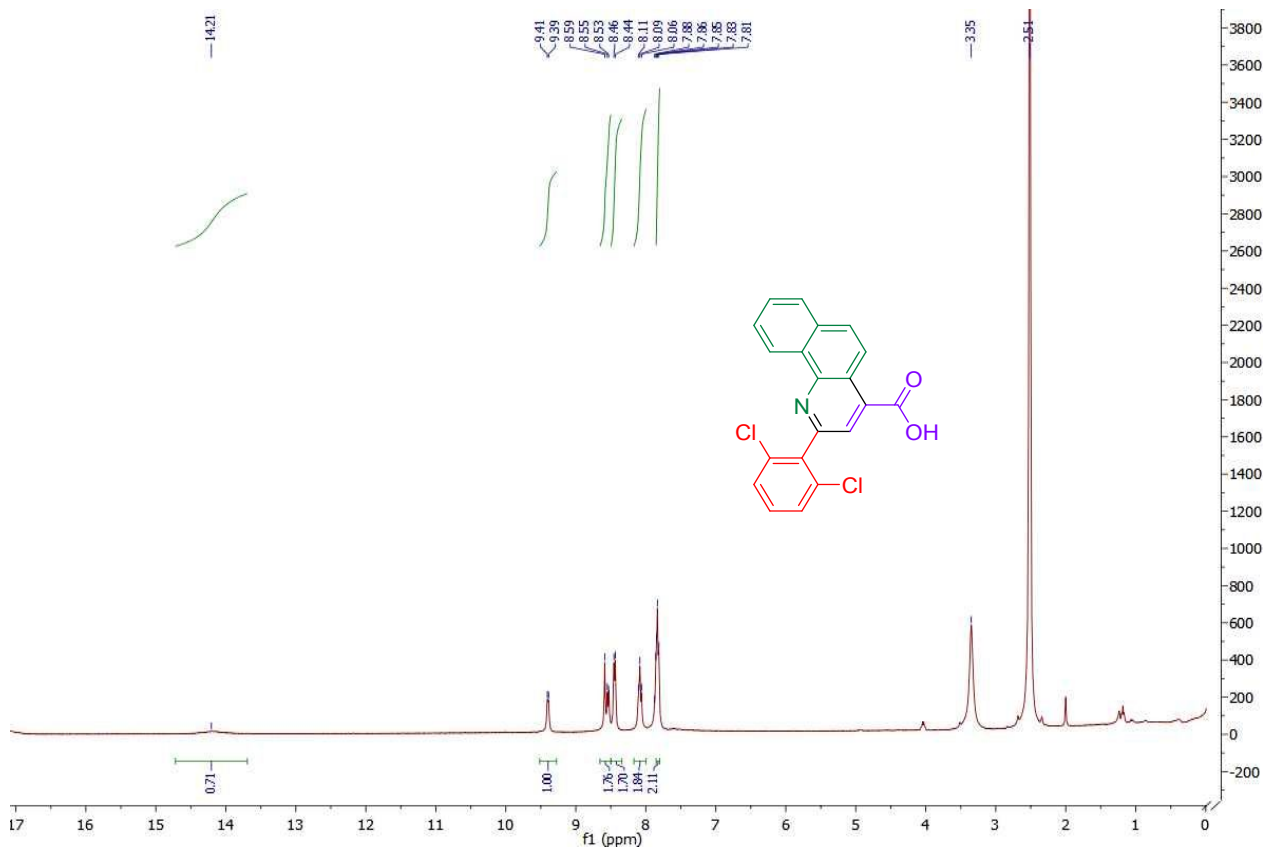

Figure S27:  $^{13}\text{C}$  NMR spectrum of 2-(2,6-dichlorophenyl)benzo[*h*]quinoline-4-carboxylic acid (1i)

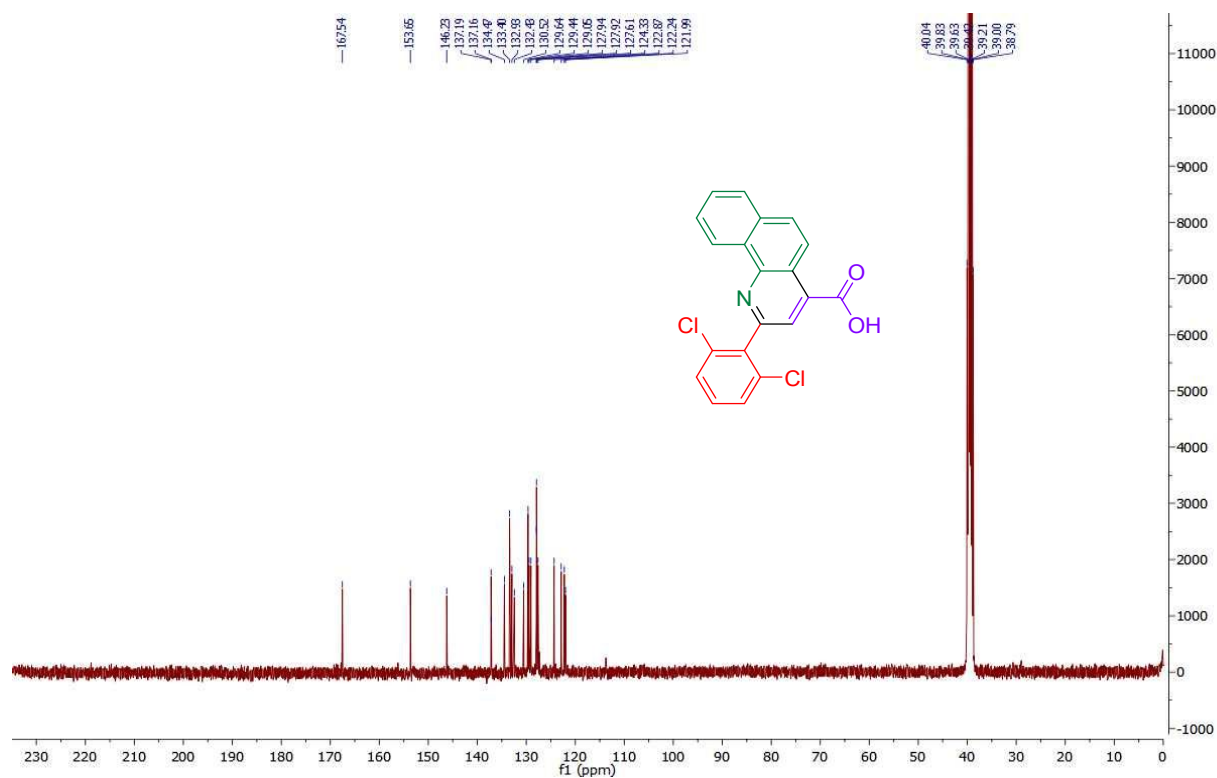

Figure S28: FT-IR spectrum of 2-(3-fluorophenyl)benzo[*h*]quinoline-4-carboxylic acid (1j)

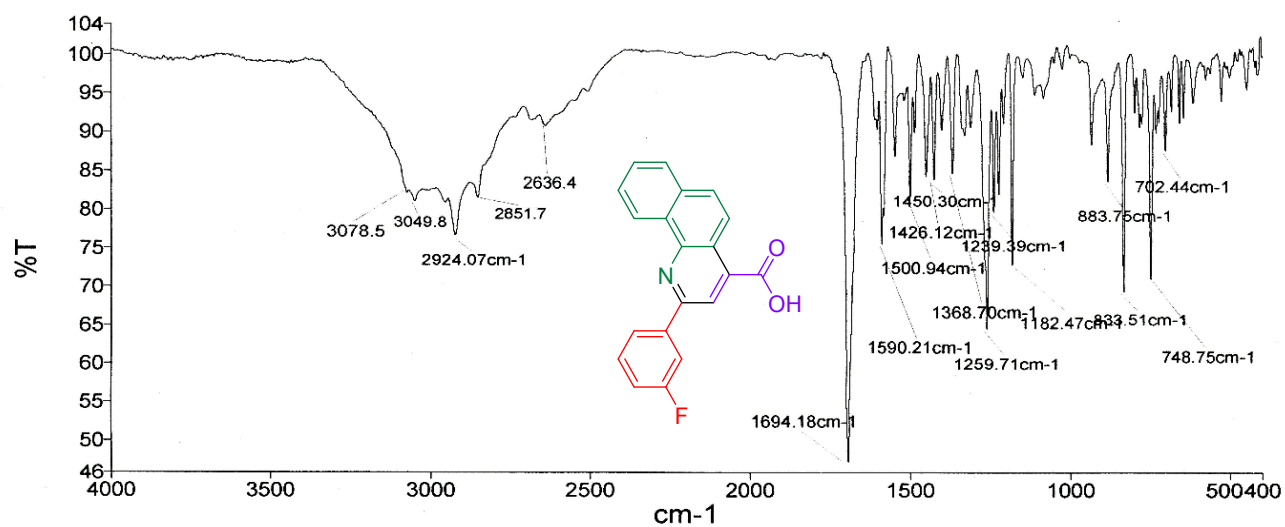

Figure S29:  $^1\text{H}$  NMR spectrum of 2-(3-fluorophenyl)benzo[*h*]quinoline-4-carboxylic acid (1j)

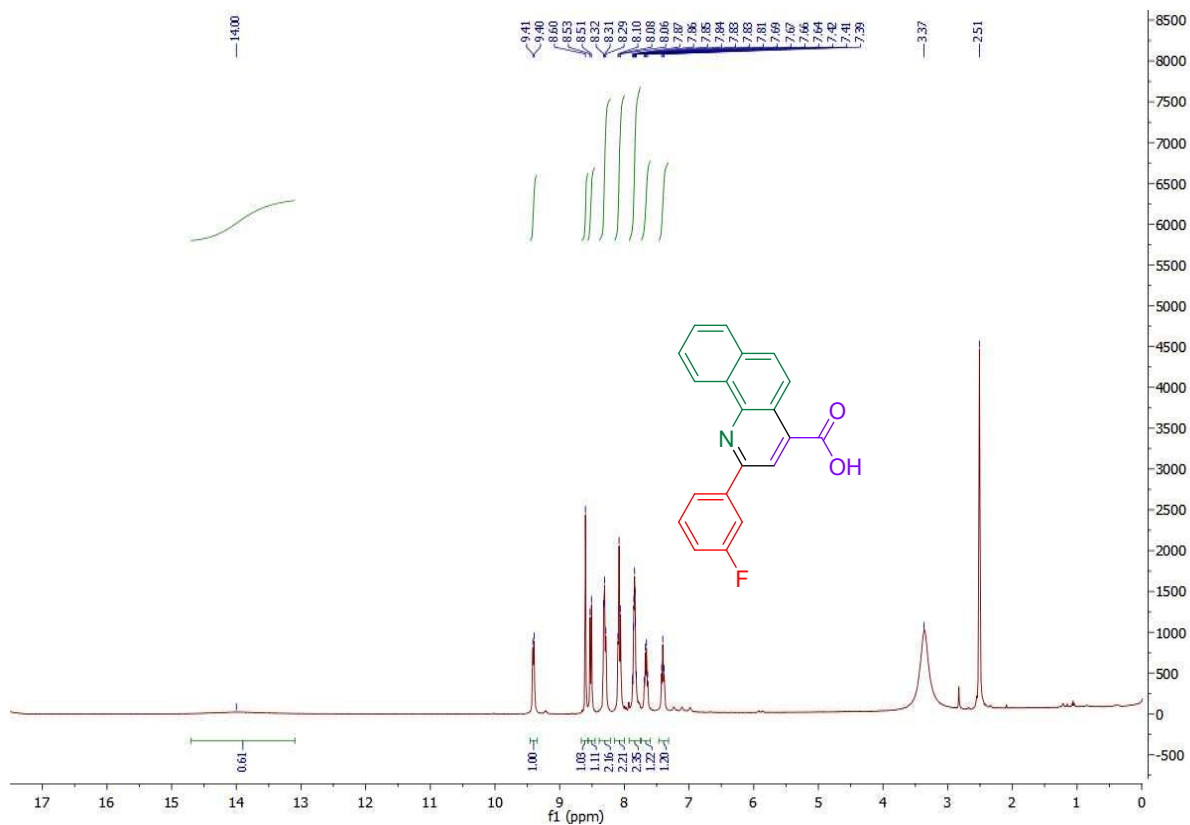

Figure S30:  $^{13}\text{C}$  NMR spectrum of 2-(3-fluorophenyl)benzo[*h*]quinoline-4-carboxylic acid (1j)

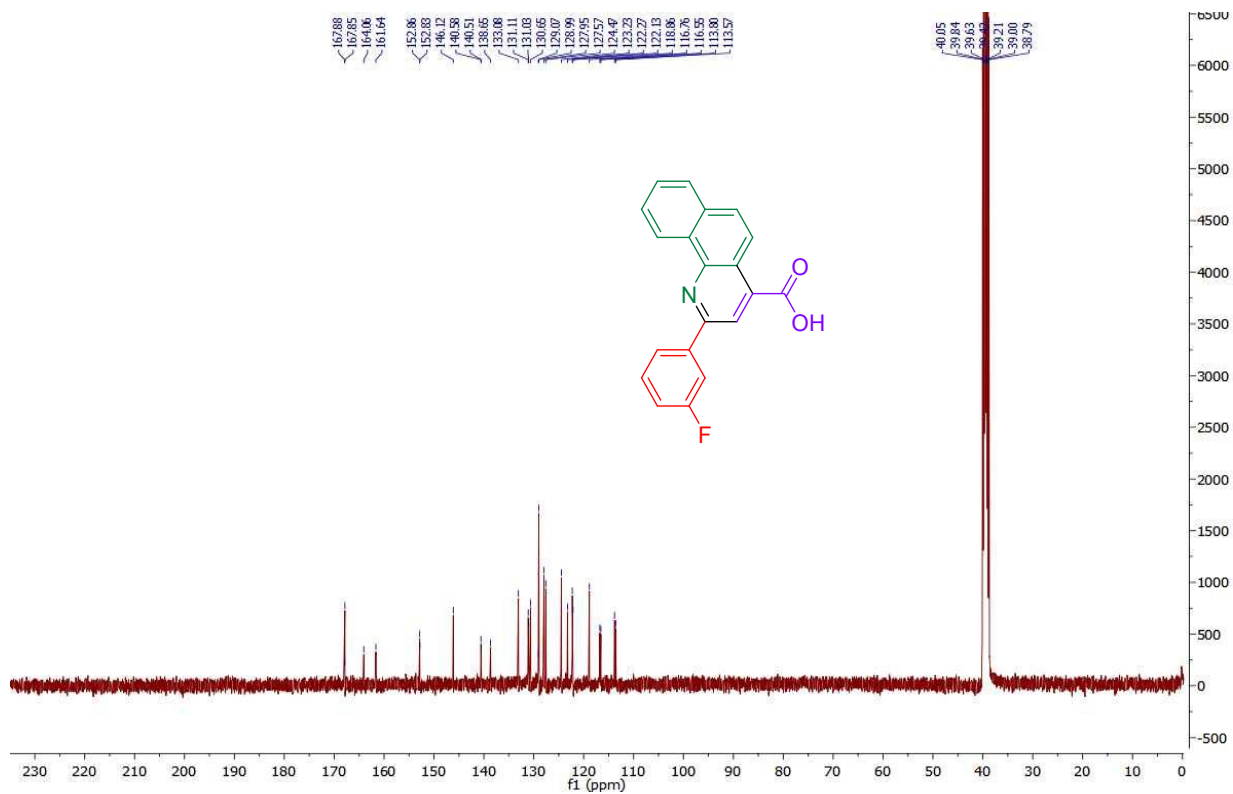



Figure S31: FT-IR spectrum of 2-(3,4-difluorophenyl)benzo[*h*]quinoline-4-carboxylic acid

(11)

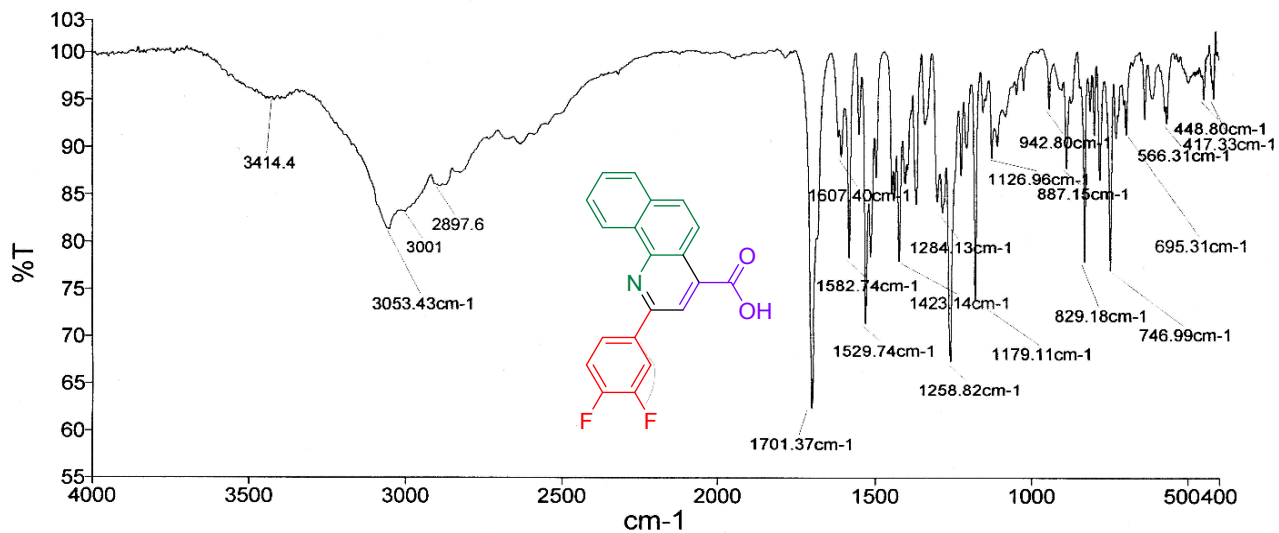

Figure S32: <sup>1</sup>H NMR spectrum of 2-(3,4-difluorophenyl)benzo[*h*]quinoline-4-carboxylic acid

(11)

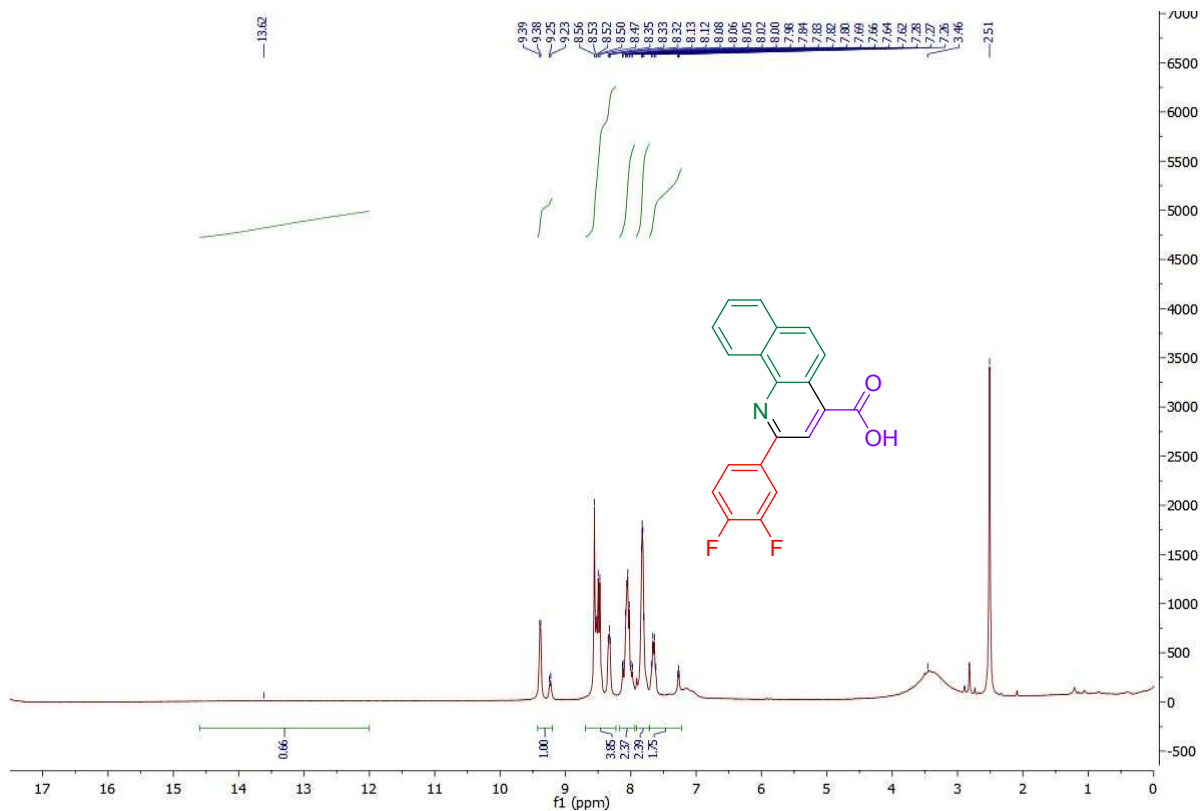

Figure S33:  $^{13}\text{C}$  NMR spectrum of 2-(3,4-difluorophenyl)benzo[*h*]quinoline-4-carboxylic acid (1l)

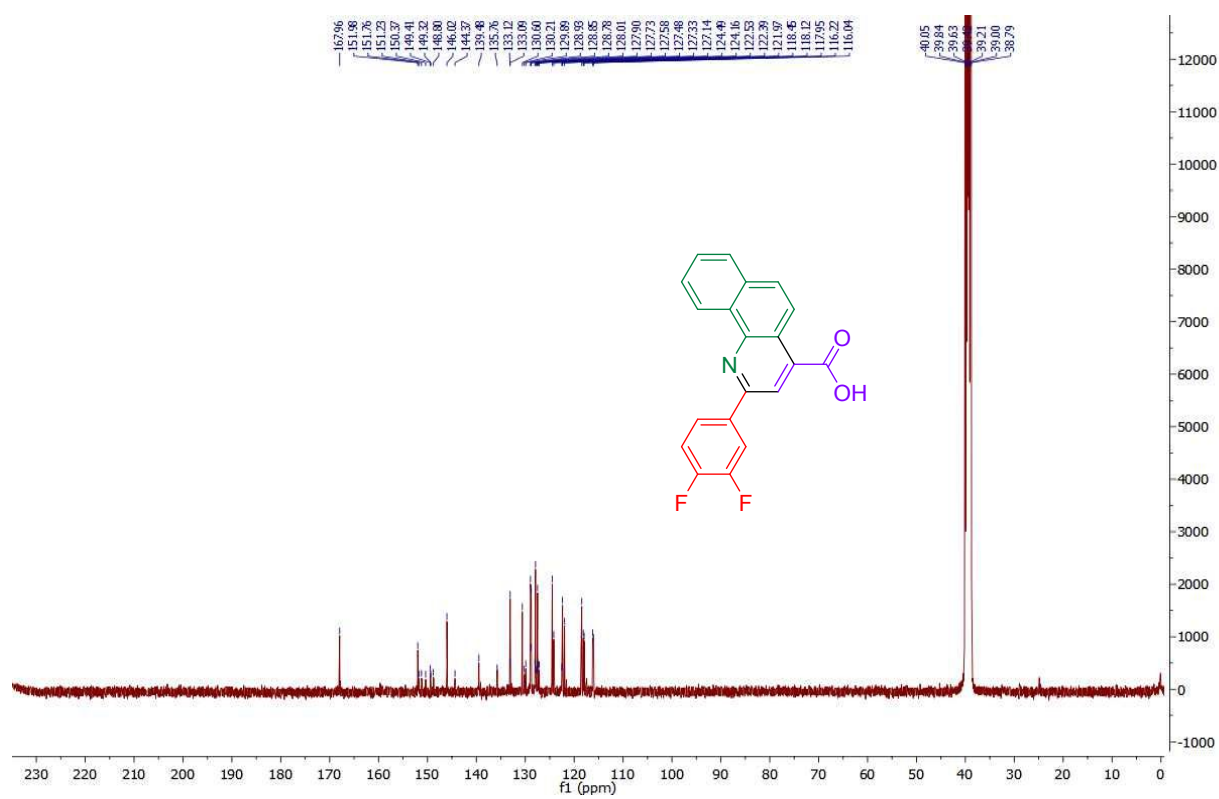

Figure S34: FT-IR spectrum of 2-(3,5-difluorophenyl)benzo[*h*]quinoline-4-carboxylic acid (1m)

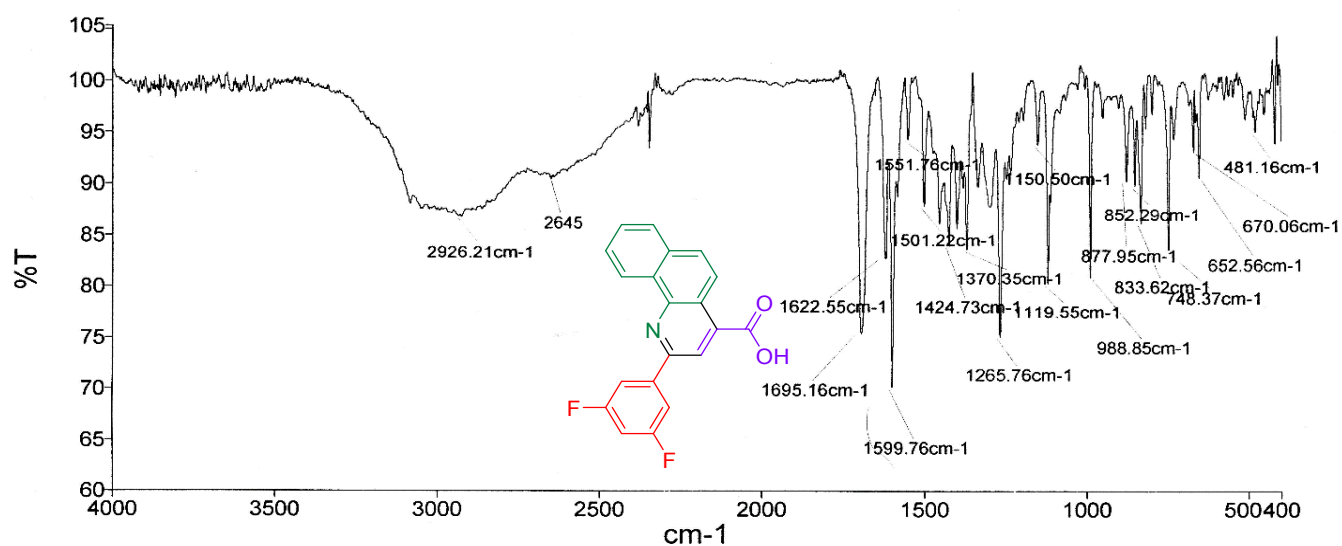

Figure S35:  $^1\text{H}$  NMR spectrum of 2-(3,5-difluorophenyl)benzo[*h*]quinoline-4-carboxylic acid (1m)

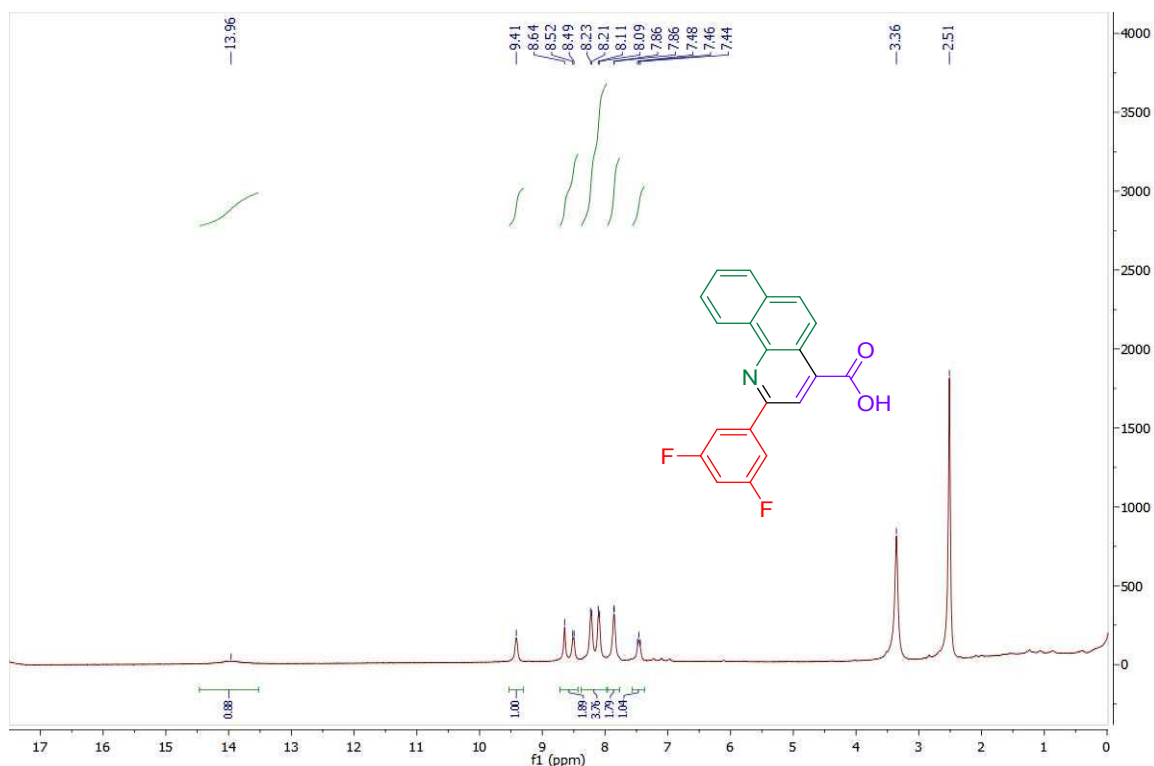

Figure S36:  $^{13}\text{C}$  NMR spectrum of 2-(3,5-difluorophenyl)benzo[*h*]quinoline-4-carboxylic acid (1m)

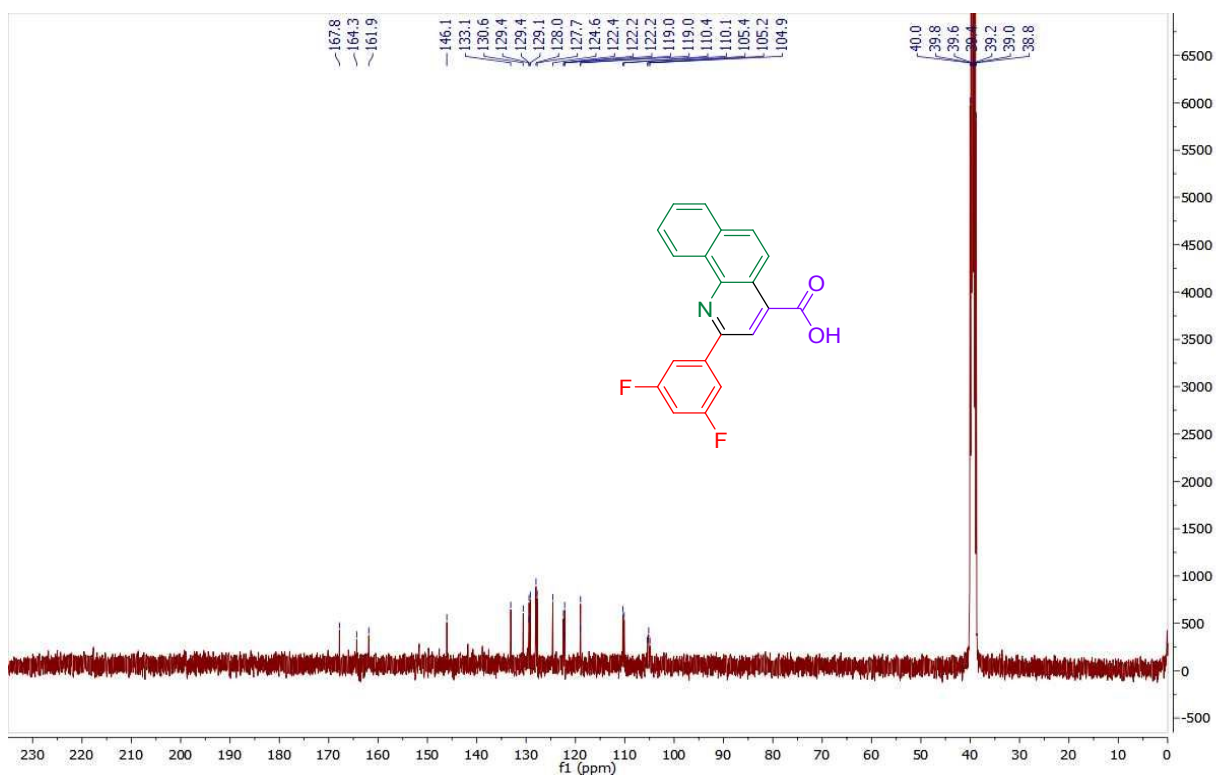

Figure S37: FT-IR spectrum of 2-(pyridin-3-yl)benzo[*h*]quinoline-4-carboxylic acid (1n)

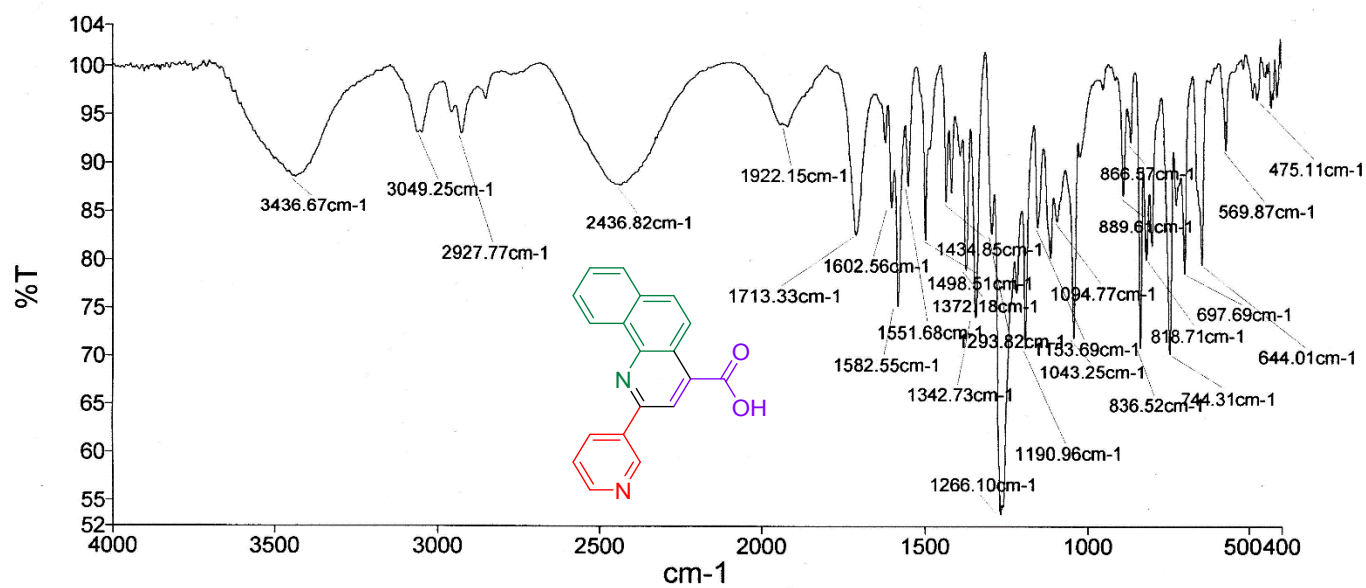

Figure S38: <sup>1</sup>H NMR spectrum of 2-(pyridin-3-yl)benzo[*h*]quinoline-4-carboxylic acid (1n)

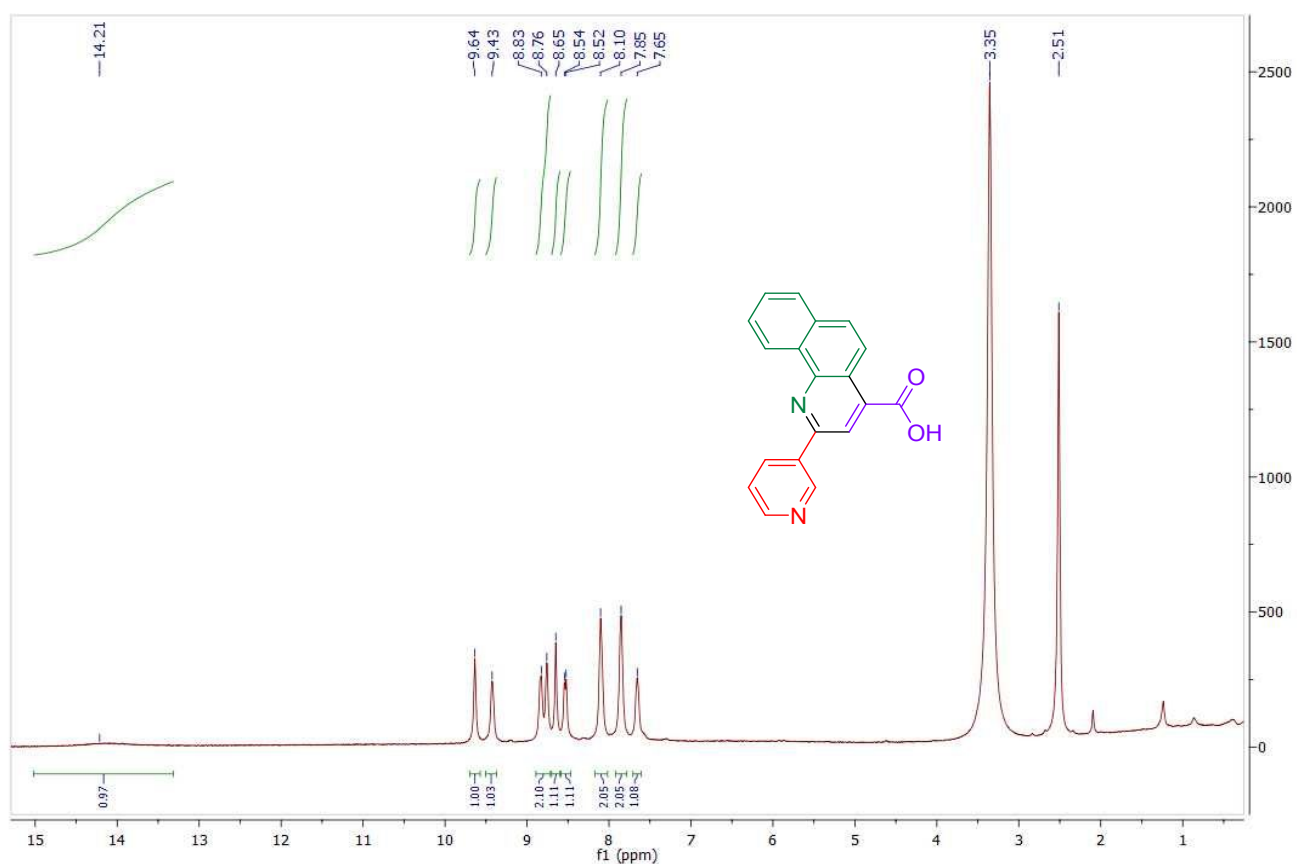

Figure S39:  $^{13}\text{C}$  NMR spectrum of 2-(pyridin-3-yl)benzo[*h*]quinoline-4-carboxylic acid (1n)

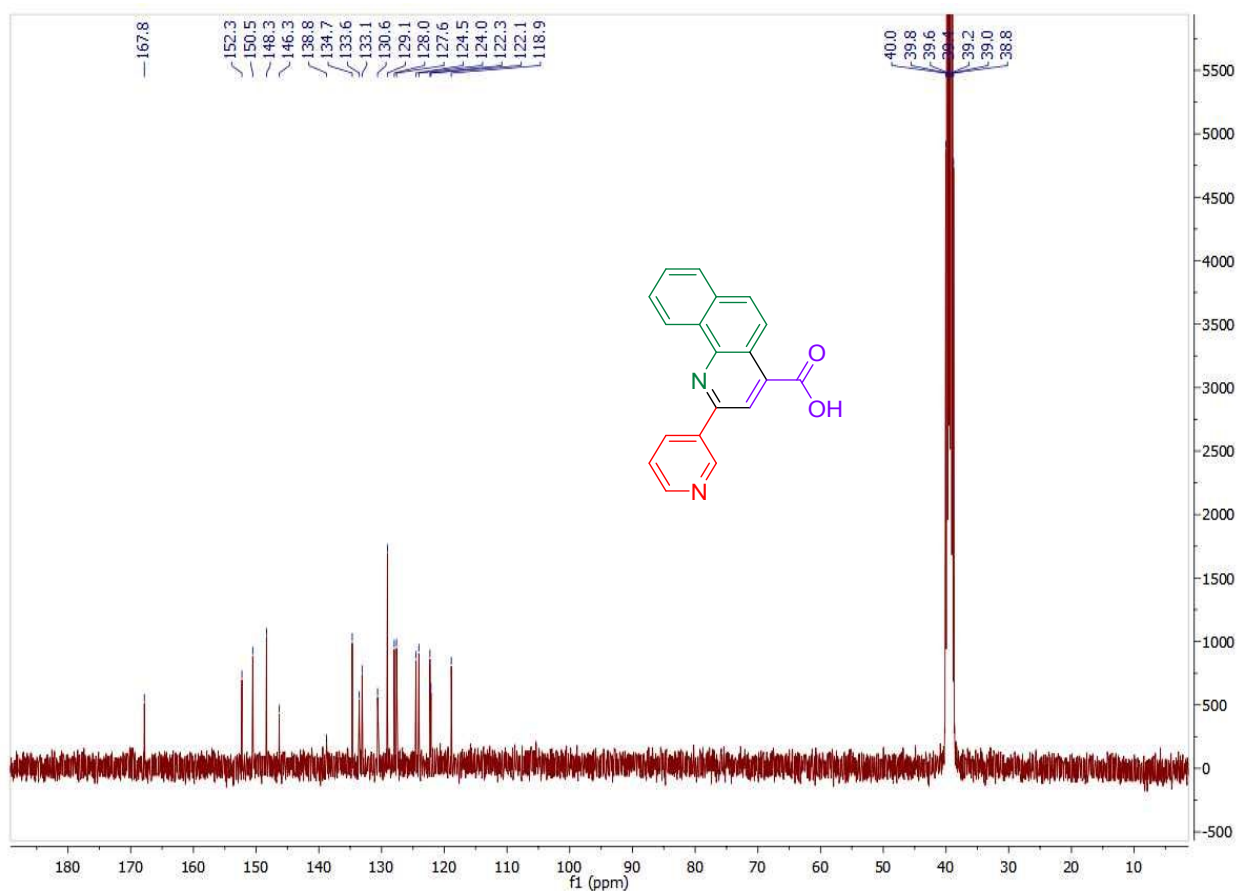

Figure S40: FT-IR spectrum of 2-(naphthalen-2-yl)benzo[*h*]quinoline-4-carboxylic acid (1o)

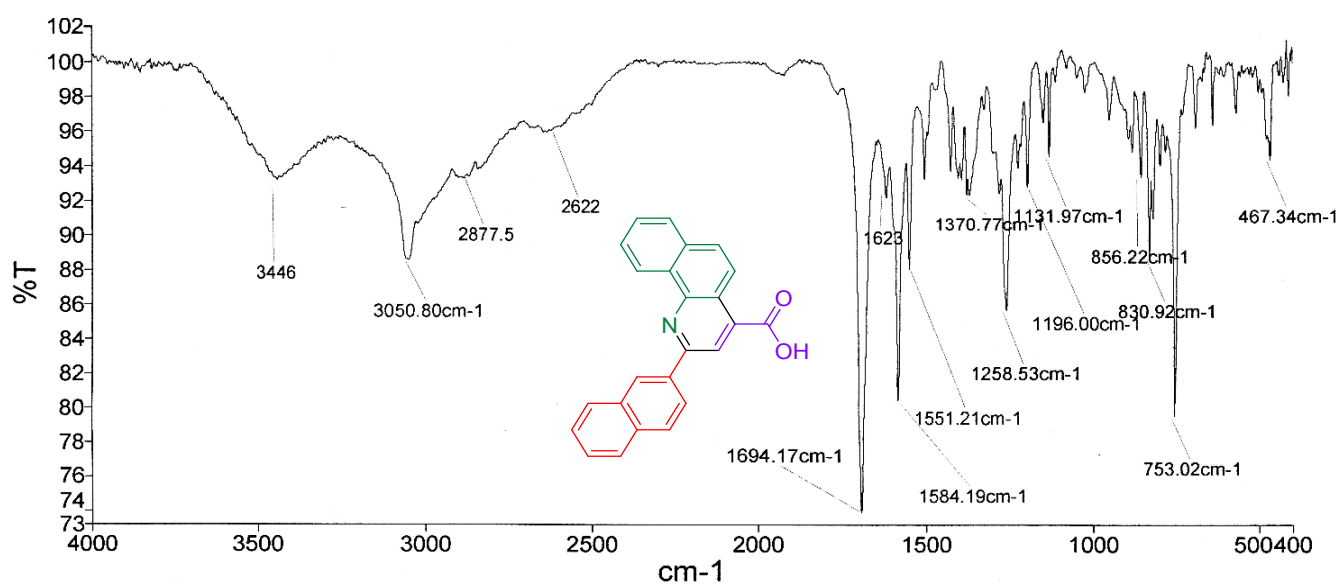

Figure S41:  $^1\text{H}$  NMR spectrum of 2-(naphthalen-2-yl)benzo[*h*]quinoline-4-carboxylic acid

(1o)

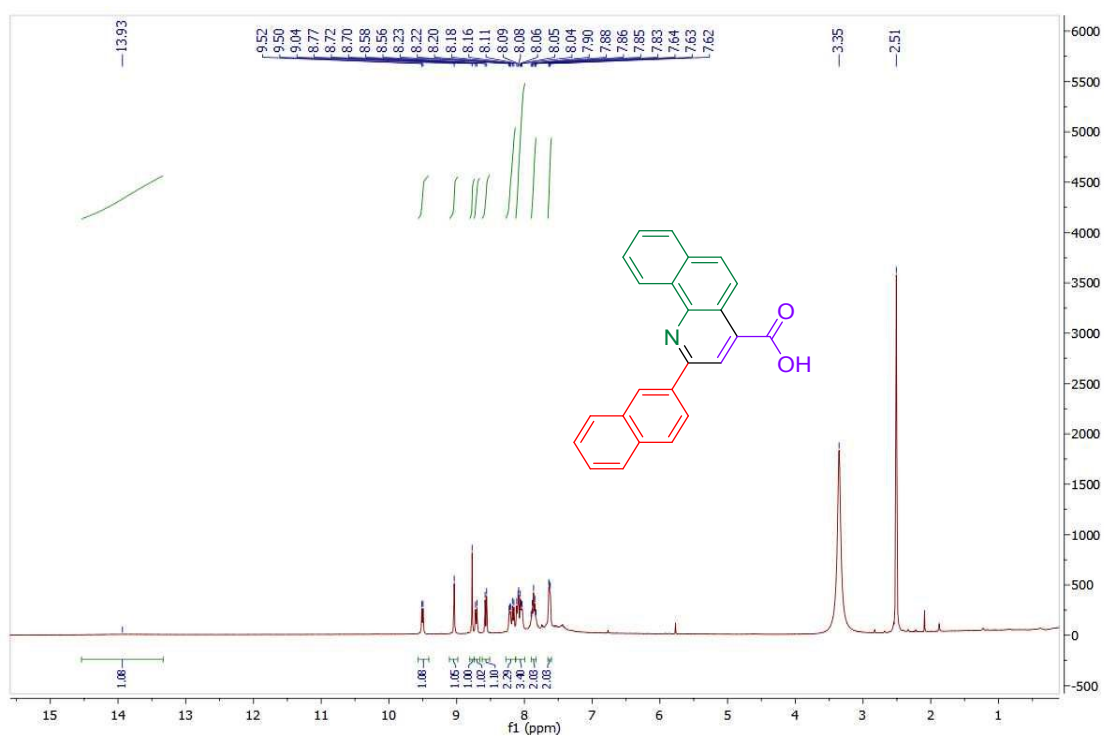

Figure S42:  $^{13}\text{C}$  NMR spectrum of 2-(naphthalen-2-yl)benzo[*h*]quinoline-4-carboxylic acid

(1o)

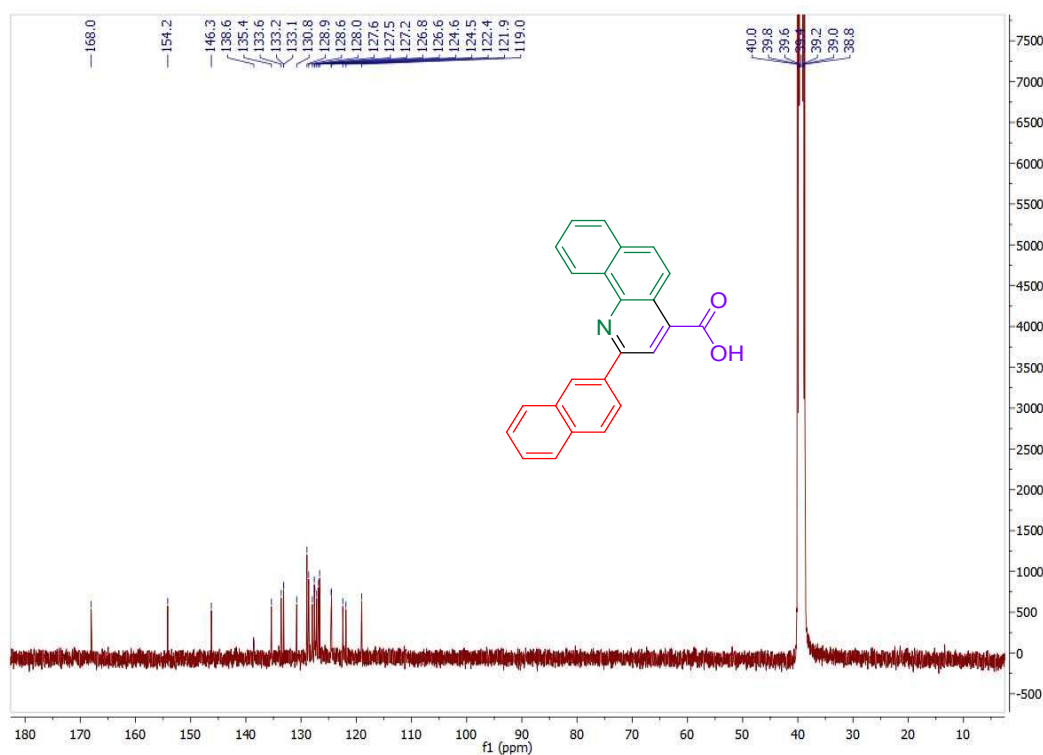

Figure S43:  $^1\text{H}$  NMR spectrum of urea based ligand

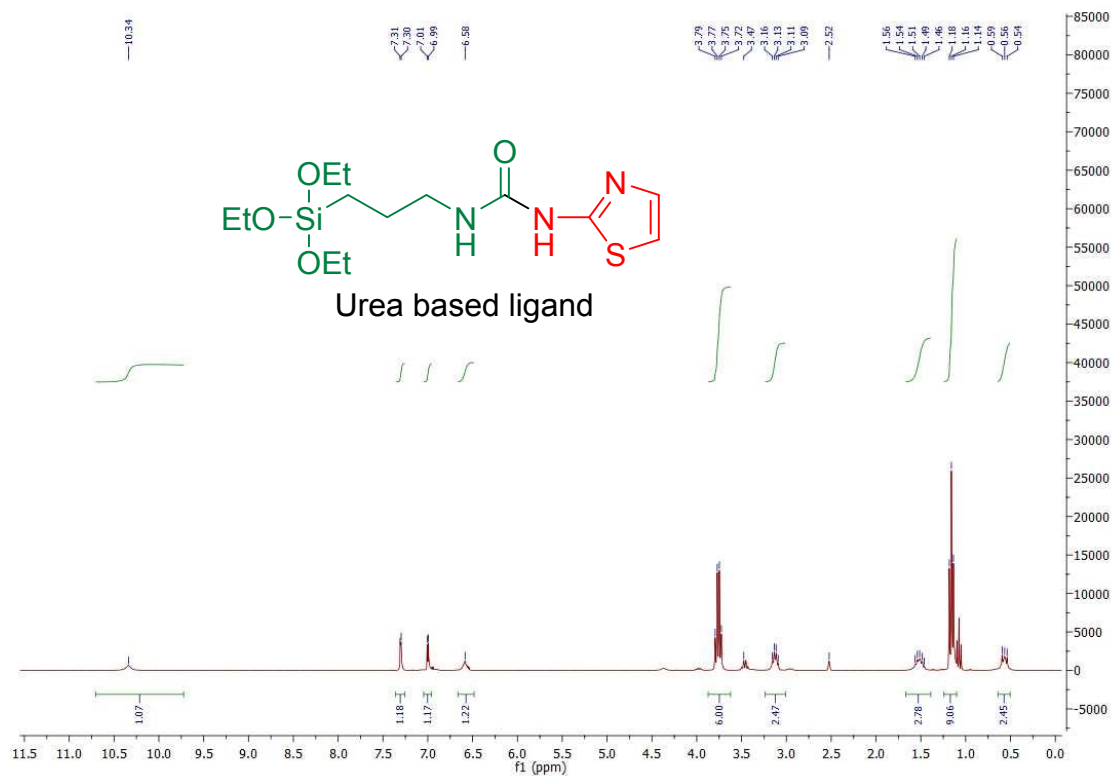

Figure S44:  $^{13}\text{C}$  NMR spectrum of urea based ligand

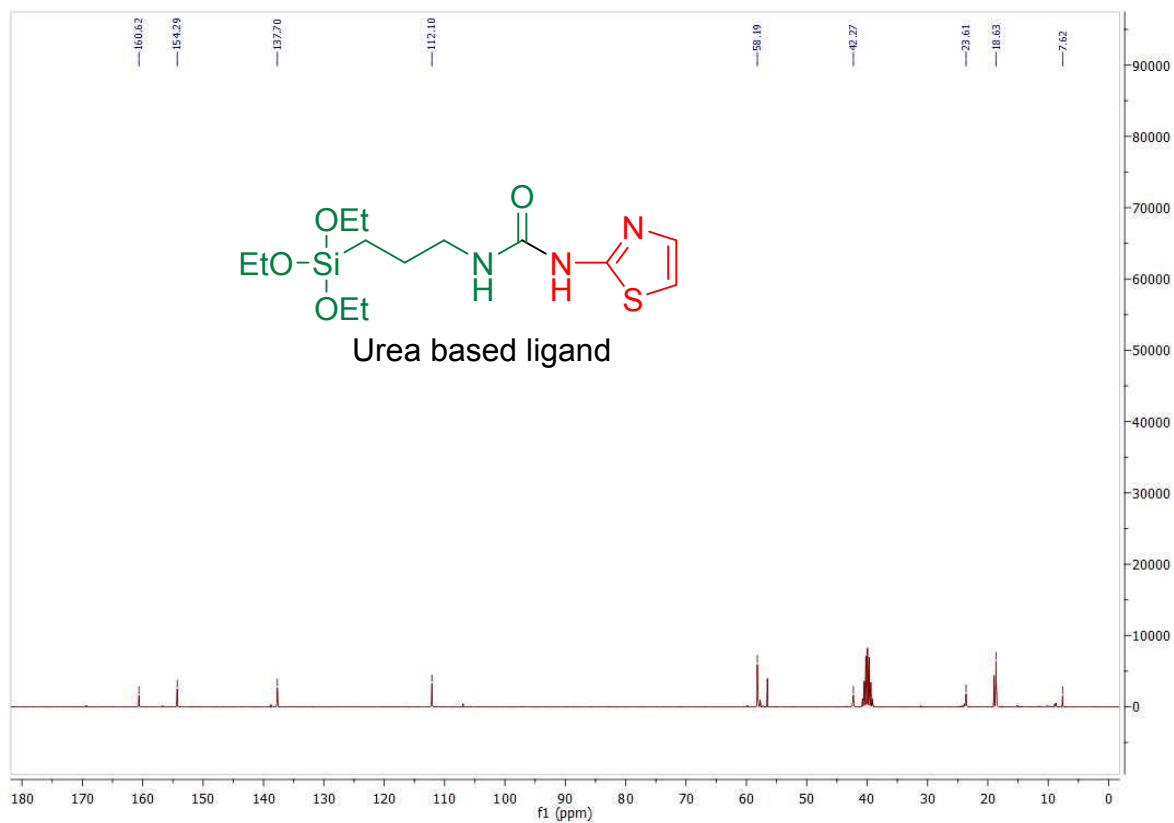

Supplement: ao9b03277_si_001.pdf [file ao9b03277_si_001.pdf]
